# Supplementary material for: OsNF-YB7 inactivates OsGLK1 to inhibit chlorophyll biosynthesis in rice embryo
Source: eLife. 2024 Sep 17;13:RP96553. doi: 10.7554/eLife.96553 (PMC11407766; doi:10.7554/eLife.96553)
Supplement: Figure 4—source data 1. [file elife-96553-fig4-data1.xlsx]

## Sheet: Sheet1
Supplemental Table 1. Differentially expressed genes (DEGs) in the 10-DAF-old embryos of OsGLK1-OX.
Locus ID	OsGLK1-OX vs. WT - Fold change (RPKMOsGLK1-OX+1)/(RPKMWT+1)	OsGLK1-OX vs. WT - FDR p-value	WT-1_RPKM	WT-2_RPKM	OsGLK1-OX-1_RPKM	OsGLK1-OX-2_RPKM	MSU Annotation
LOC_Os03g12510	0.0791797	1.80033e-72	36.53	43.7922	1.38298	3.13526	non-symbiotic hemoglobin 2, putative, expressed
LOC_Os05g26386	0.109369	4.58697e-27	78.6536	164.408	17.3699	7.43222	prolamin precursor, putative, expressed
LOC_Os05g26350	0.110797	2.7464e-35	15.921	27.4255	1.71359	1.31064	PROLM4 - Prolamin precursor, expressed
LOC_Os05g26720	0.114315	3.03697e-26	11.1466	18.0508	1.02354	0.542779	PROLM16 - Prolamin precursor, expressed
LOC_Os05g26460	0.137994	1.17091e-18	8.71644	24.5169	1.80087	1.06111	PROLM11 - Prolamin precursor, expressed
LOC_Os04g31790	0.145078	2.44915e-37	16.7357	19.7281	0.967939	2.61231	expressed protein
LOC_Os05g26368	0.167938	6.29696e-21	9.409	14.717	1.33757	1.04997	prolamin precursor, putative, expressed
LOC_Os04g28420	0.17194	1.15866e-92	38.7438	33.1574	5.76798	4.9386	peptidyl-prolyl isomerase, putative, expressed
LOC_Os10g13700	0.172554	3.44613e-18	29.8436	35.5952	2.22887	7.40793	phosphoenolpyruvate carboxykinase, putative, expressed
LOC_Os02g34270	0.192759	8.8676e-20	22.573	23.2228	5.40527	1.80779	AP2 domain containing protein, expressed
LOC_Os05g26750	0.199258	1.98056e-18	6.02929	8.28171	0.597063	0.65303	PROLM17 - Prolamin precursor, expressed
LOC_Os02g56680	0.20123	1.54031e-11	45.7805	49.2004	3.41704	14.0984	dehydrogenase, putative, expressed
LOC_Os04g01740	0.225841	1.0343e-21	32.7285	26.8599	8.1829	3.7263	heat shock protein, putative, expressed
LOC_Os02g49720	0.238158	1.71442e-45	94.7357	110.551	21.1694	26.1976	aldehyde dehydrogenase, putative, expressed
LOC_Os05g48930	0.242918	1.83151e-18	30.1566	39.6801	4.65368	10.7968	OsGrx_S2 - glutaredoxin subgroup III, expressed
LOC_Os01g67950	0.246326	3.3804e-14	16.6355	16.8779	1.67103	5.07685	ubiquitin family protein, putative, expressed
LOC_Os09g25060	0.247382	4.36538e-13	5.73861	9.05105	0.373963	1.77949	WRKY76, expressed
LOC_Os03g16020	0.258697	2.45139e-13	19.4829	16.8474	5.63627	2.27967	hsp20/alpha crystallin family protein, putative, expressed
LOC_Os09g15480	0.260805	2.47407e-22	33.7757	38.1137	5.6922	11.5785	Ser/Thr-rich protein T10 in DGCR region, putative, expressed
LOC_Os05g28740	0.268041	4.58697e-27	74.6404	91.9076	16.6767	26.5012	universal stress protein domain containing protein, putative, expressed
LOC_Os03g53340	0.270401	2.23418e-20	52.785	43.5714	15.7786	8.81716	HSF-type DNA-binding domain containing protein, expressed
LOC_Os01g44050	0.281193	1.15565e-26	7.46463	9.00028	1.45346	1.73874	siroheme synthase, putative, expressed
LOC_Os02g52150	0.283298	2.52768e-17	182.697	165.625	63.434	33.8115	heat shock 22 kDa protein, mitochondrial precursor, putative, expressed
LOC_Os05g39320	0.288737	0.00173858	41.8496	43.1399	2.17465	20.9424	thiamine pyrophosphate enzyme, C-terminal TPP binding domain containing protein, expressed
LOC_Os02g56460	0.288859	2.28228e-16	147.814	171.562	29.6759	61.1565	dehydrogenase, putative, expressed
LOC_Os02g32840	0.293025	7.15088e-48	134.183	138.956	32.37	46.2526	zinc finger A20 and AN1 domain-containing stress-associated protein, putative, expressed
LOC_Os05g43040	0.298987	1.47192e-15	13.9002	17.3297	5.2778	2.65752	tetratricopeptide repeat domain containing protein, expressed
LOC_Os06g06520	0.3002	2.14073e-13	17.218	14.0575	2.24502	5.7443	GDSL-like lipase/acylhydrolase, putative, expressed
LOC_Os05g26770	0.300391	1.47784e-06	1.70724	4.78385	0.344887	0.205754	PROLM18 - Prolamin precursor, expressed
LOC_Os08g37470	0.301417	5.23852e-06	24.069	29.8663	2.69221	12.1677	2-aminoethanethiol dioxygenase, putative, expressed
LOC_Os01g04380	0.304117	8.70283e-14	44.9163	42.2384	17.3159	7.79754	hsp20/alpha crystallin family protein, putative, expressed
LOC_Os06g09560	0.305792	1.50278e-21	36.3035	34.2175	12.3051	7.87123	heat shock protein DnaJ, putative, expressed
LOC_Os04g28120	0.307168	7.40994e-20	43.1631	29.2352	11.3913	9.46145	response regulator receiver domain containing protein, expressed
LOC_Os05g39310	0.308539	3.57089e-07	513.468	604.055	81.8303	261.586	thiamine pyrophosphate enzyme, C-terminal TPP binding domain containing protein, expressed
LOC_Os10g28350	0.309055	6.94695e-18	16.8825	14.3282	3.5801	4.68384	1,2-dihydroxy-3-keto-5-methylthiopentene dioxygenase protein, putative, expressed
LOC_Os01g17330	0.309583	8.52823e-14	3.5169	3.38286	0.137955	0.617263	eukaryotic translation initiation factor 6, putative, expressed
LOC_Os04g39980	0.319266	2.61195e-44	91.1242	87.8521	27.9326	27.847	gibberellin 20 oxidase 2, putative, expressed
LOC_Os03g55240	0.327005	5.08552e-21	5.97899	8.9925	1.64071	1.90906	cytochrome P450, putative, expressed
LOC_Os09g35870	0.329811	3.22458e-13	5.06027	6.16896	1.20812	1.15504	OsIAA26 - Auxin-responsive Aux/IAA gene family member, expressed
LOC_Os02g08490	0.331238	1.01051e-19	55.8856	53.6426	20.9839	13.9585	chaperone protein clpB 1, putative, expressed
LOC_Os02g18650	0.335686	3.06033e-10	87.2583	109.515	18.5622	46.1633	pectinesterase, putative, expressed
LOC_Os01g24030	0.336353	1.38984e-12	32.9997	38.7836	6.99247	15.8248	AMP-binding enzyme, putative, expressed
LOC_Os03g12820	0.341592	1.58184e-14	7.32588	7.21574	1.1438	2.50668	ATP8, putative, expressed
LOC_Os09g28420	0.342459	3.80711e-10	4.0368	6.31579	0.574292	1.65597	alpha-amylase precursor, putative, expressed
LOC_Os03g25270	0.346427	6.73935e-24	109.093	113.703	32.168	43.7076	pyrrolidone-carboxylate peptidase, putative, expressed
LOC_Os03g06080	0.347652	2.31041e-19	54.2383	59.9612	22.9905	15.4065	heavy metal-associated domain containing protein, expressed
LOC_Os07g11920	0.34904	1.18979e-13	203.748	320.127	107.891	73.6609	PROLM22 - Prolamin precursor, expressed
LOC_Os06g10650	0.355766	2.92156e-21	84.8051	80.5546	22.6498	34.891	tyrosine phosphatase family protein, putative, expressed
LOC_Os03g18230	0.356864	1.55245e-15	22.0764	21.3944	5.2442	8.9827	expressed protein
LOC_Os09g34230	0.359509	7.20186e-13	32.4185	42.7401	16.7575	8.98172	UDP-glucoronosyl/UDP-glucosyl transferase, putative, expressed
LOC_Os03g17470	0.362103	1.11799e-07	3.81384	4.35343	1.02326	0.65834	IN2-1 protein, putative, expressed
LOC_Os02g12380	0.363905	2.48586e-35	42.8067	47.9982	13.6105	18.1617	histone deacetylase, putative, expressed
LOC_Os01g52260	0.364268	3.7104e-31	27.1283	25.4343	7.95937	9.91604	serine acetyltransferase protein, putative, expressed
LOC_Os05g42350	0.366471	7.3908e-26	64.7136	84.1309	26.3592	26.9209	ferredoxin--nitrite reductase, putative, expressed
LOC_Os03g02380	0.367733	1.08171e-16	50.9998	42.1225	12.5066	20.473	major facilitator superfamily domain-containing protein 5, putative, expressed
LOC_Os06g48030	0.368278	1.76908e-23	28.7257	34.9561	9.61009	12.579	peroxidase precursor, putative, expressed
LOC_Os05g37950	0.368855	2.59001e-19	11.8384	10.5558	3.28398	3.71395	guanylyl cyclase, putative, expressed
LOC_Os01g04800	0.368984	6.07994e-18	45.1625	50.7357	13.4906	20.6323	B3 DNA binding domain containing protein, expressed
LOC_Os03g53400	0.372889	3.23e-09	26.5409	23.3958	12.0011	5.36548	transmembrane BAX inhibitor motif-containing protein, putative, expressed
LOC_Os06g22919	0.37374	6.71978e-20	3.94975	3.35352	0.487719	0.989284	DEFL9 - Defensin and Defensin-like DEFL family, expressed
LOC_Os03g63330	0.377861	1.66883e-13	170.403	183.072	49.9446	82.3754	aspartokinase, chloroplast precursor, putative, expressed
LOC_Os01g36580	0.378562	4.90674e-18	17.2696	18.619	4.99703	7.34619	auxin-induced protein 5NG4, putative, expressed
LOC_Os05g35050	0.380734	2.10326e-08	3.39447	4.34619	0.705903	1.00269	ctr copper transporter family protein, putative, expressed
LOC_Os03g49430	0.381094	1.13426e-17	6.12159	5.12657	1.8593	1.18949	pre-mRNA-splicing factor, putative, expressed
LOC_Os06g38294	0.383402	2.93308e-23	22.2581	25.6765	9.87359	7.27143	peptide transporter PTR2, putative, expressed
LOC_Os02g56120	0.385371	1.99699e-13	129.083	135.12	37.0244	63.5625	OsIAA9 - Auxin-responsive Aux/IAA gene family member, expressed
LOC_Os04g32320	0.389306	3.97447e-16	8.45868	9.24071	2.96143	2.70765	glycerophosphoryl diester phosphodiesterase family protein, putative, expressed
LOC_Os05g30510	0.390471	0.00419823	2.44324	5.63109	0.0747836	1.85895	expressed protein
LOC_Os09g28060	0.390815	9.00547e-31	59.6593	51.6301	17.9669	24.3084	MORN repeat domain containing protein, expressed
LOC_Os06g39240	0.394296	4.16251e-30	193.973	191.463	76.3313	74.4332	endothelial differentiation-related factor 1, putative, expressed
LOC_Os05g05290	0.399481	5.22613e-09	7.08541	9.97592	3.50436	2.11028	expressed protein
LOC_Os03g18790	0.399813	3.28618e-21	7.74046	7.76282	2.58944	2.40859	SAG20, putative, expressed
LOC_Os03g19250	0.411036	1.40639e-11	117.113	136.056	37.784	65.0996	AMP-binding enzyme, putative, expressed
LOC_Os04g33600	0.411551	1.52853e-14	6.24693	7.89093	2.24351	2.39804	hydrolase, alpha/beta fold family protein, putative, expressed
LOC_Os12g42980	0.411749	4.10804e-15	7.0277	8.80228	2.56707	2.77441	cysteine synthase, putative, expressed
LOC_Os06g46740	0.412117	3.17604e-07	4.96166	5.34155	2.20209	0.868272	early nodulin 20 precursor, putative, expressed
LOC_Os08g43200	0.413242	5.07561e-09	6.35467	5.70331	1.83391	1.97543	dehydration-responsive element-binding protein, putative, expressed
LOC_Os02g16830	0.413506	3.74544e-08	240.819	476.068	164.945	130.32	glutelin, putative, expressed
LOC_Os03g03334	0.414621	0.000128123	21.414	20.8988	3.66455	12.7085	expressed protein
LOC_Os03g16260	0.417782	0.00045998	82.9116	87.3311	15.1019	54.8579	protein kinase, putative, expressed
LOC_Os07g10570	0.418008	1.47673e-10	450.914	722.611	259.902	229.477	PROLM25 - Prolamin precursor, expressed
LOC_Os03g19000	0.41917	3.14135e-09	9.6888	11.6512	2.61777	5.16568	peroxisomal biogenesis factor 11, putative, expressed
LOC_Os01g64310	0.42107	3.65846e-09	3.08575	3.81467	0.497646	1.25005	no apical meristem protein, putative, expressed
LOC_Os01g60860	0.422897	4.14871e-13	17.9687	20.8939	5.69963	9.58108	spotted leaf 11, putative, expressed
LOC_Os01g50370	0.426259	4.39875e-10	2.10476	3.27037	0.587437	0.55628	STE_MEKK_ste11_MAP3K.4 - STE kinases include homologs to sterile 7, sterile 11 and sterile 20 from yeast, expressed
LOC_Os01g55690	0.428398	4.32006e-08	872.453	1676.03	551.266	539.355	glutelin, putative, expressed
LOC_Os12g02810	0.428577	9.63882e-17	134.233	138.191	48.664	66.9477	protein kinase domain containing protein, expressed
LOC_Os10g26060	0.428941	1.7999e-08	585.608	1089.13	355.302	361.921	glutelin, putative, expressed
LOC_Os03g31750	0.429482	9.10985e-13	597.817	595.829	224.326	287.182	pyruvate, phosphate dikinase, chloroplast precursor, putative, expressed
LOC_Os01g32380	0.429667	5.24948e-10	104.693	113.108	32.3685	60.0723	expressed protein
LOC_Os02g16820	0.432626	1.6191e-08	360.51	661.662	225.039	216.044	glutelin, putative, expressed
LOC_Os01g52900	0.433569	0.000396401	51.4119	54.9831	9.92037	35.0763	expressed protein
LOC_Os02g34260	0.433944	9.57841e-05	2.35358	1.81698	0.407536	0.270144	AP2 domain containing protein, expressed
LOC_Os04g38400	0.434236	1.71967e-09	8.90743	6.74315	3.45279	2.21173	ethylene-insensitive 3, putative, expressed
LOC_Os07g09630	0.435294	7.304e-10	91.8734	99.7442	28.484	53.7965	oxidoreductase, putative, expressed
LOC_Os01g10950	0.435416	1.60103e-14	6.36816	8.47909	2.62057	2.71498	peptide-N4-asparagine amidase A, putative, expressed
LOC_Os06g40120	0.435563	2.17907e-21	19.1454	18.942	7.12627	8.33429	SPX domain containing protein, putative, expressed
LOC_Os09g28180	0.436039	3.5356e-07	6.66832	7.24842	1.28139	3.65894	D-mannose binding lectin family protein, expressed
LOC_Os10g38660	0.436668	1.28032e-05	7.80104	8.92914	1.57593	4.60294	glutathione S-transferase, putative, expressed
LOC_Os01g68960	0.436674	5.80397e-08	6.4737	6.10377	2.32375	2.04186	expressed protein
LOC_Os03g58880	0.436681	3.88503e-12	47.3742	45.3277	15.0246	24.33	oxidoreductase, putative, expressed
LOC_Os06g40210	0.437116	4.98377e-08	7.51273	9.31121	3.15211	3.07613	expressed protein
LOC_Os05g40890	0.43736	3.32595e-10	10.0468	10.4337	4.64319	3.1889	expressed protein
LOC_Os10g20470	0.437532	1.45771e-23	23.4347	27.3318	10.2868	10.8002	MATE efflux family protein, putative, expressed
LOC_Os07g10580	0.437996	8.70585e-10	811.192	1288.57	468.858	449.705	PROLM26 - Prolamin precursor, expressed
LOC_Os02g15169	0.438561	1.24669e-07	583.931	1133.03	391.957	359.911	glutelin, putative, expressed
LOC_Os04g45480	0.438609	1.05623e-12	5.68309	4.65926	1.89873	1.51473	heat shock protein STI, putative, expressed
LOC_Os04g14680	0.438633	1.52235e-07	2.65825	2.50376	0.513315	0.628176	OsAPx3 - Peroxisomal Ascorbate Peroxidase encoding gene 5,8, expressed
LOC_Os01g06560	0.439002	6.93982e-21	154.265	152.234	60.299	73.1329	transcription factor HBP-1b, putative, expressed
LOC_Os03g42130	0.439315	7.54223e-13	66.1616	88.2169	38.5095	28.19	gibberellin 20 oxidase 2, putative, expressed
LOC_Os08g44390	0.443033	1.70991e-23	13.3155	13.5858	4.81164	5.99256	EF hand family protein, putative, expressed
LOC_Os09g20460	0.443904	8.78583e-13	4.06764	5.60319	1.52261	1.65813	VQ domain containing protein, putative, expressed
LOC_Os03g31360	0.444655	1.73723e-07	422.944	807.743	292.849	253.271	glutelin, putative, expressed
LOC_Os07g25690	0.445238	9.2028e-05	1.10737	1.74146	0	0.15888	subtilisin N-terminal Region family protein, expressed
LOC_Os02g15150	0.447156	2.08313e-07	202.333	395.894	140.668	125.727	glutelin, putative, expressed
LOC_Os07g48730	0.448124	7.84121e-09	1.88517	2.93769	0.46244	0.595046	tyrosine protein kinase domain containing protein, putative, expressed
LOC_Os07g12510	0.449112	2.73295e-20	26.4234	26.4068	11.601	11.0239	AP2 domain containing protein, expressed
LOC_Os09g26670	0.449619	1.8609e-06	1.9044	2.52633	0.313142	0.57824	expressed protein
LOC_Os01g62810	0.449676	9.56708e-11	24.8565	22.8394	12.7002	7.64681	regulator of chromosome condensation, putative, expressed
LOC_Os03g21250	0.450104	2.89919e-09	26.2251	24.4057	7.55039	14.139	glycosyl transferase, family 8, putative, expressed
LOC_Os07g11910	0.450233	7.49234e-09	147.196	244.423	99.4228	75.7972	PROLM20 - Prolamin precursor, expressed
LOC_Os01g19820	0.450881	2.21451e-11	271.974	269.407	99.0023	143.998	universal stress protein domain containing protein, putative, expressed
LOC_Os02g47110	0.451034	6.94826e-12	31.1902	26.2058	10.0727	14.7169	ADP-ribosylation factor, putative, expressed
LOC_Os10g39920	0.452077	5.18515e-15	61.4006	58.8229	21.9117	31.3427	expressed protein
LOC_Os01g15900	0.452139	3.99766e-22	21.3773	21.8674	10.5272	7.92973	expressed protein
LOC_Os03g55680	0.452312	5.08763e-08	95.6238	139.891	37.7304	67.7006	expressed protein
LOC_Os05g33960	0.452763	3.02857e-12	5.7414	5.88252	1.83446	2.33395	peptide transporter PTR2, putative, expressed
LOC_Os08g07720	0.453462	2.71586e-09	4.84846	7.76336	2.50627	2.11963	transferase family protein, putative, expressed
LOC_Os05g35440	0.453553	7.80195e-23	9.09996	10.7716	4.0357	3.88421	serine hydroxymethyltransferase, mitochondrial precursor, putative, expressed
LOC_Os02g14600	0.454967	2.28072e-08	35.8557	58.2434	24.6933	17.0285	glutelin, putative, expressed
LOC_Os07g47620	0.455894	2.50999e-10	173.17	182.502	64.2382	96.8227	universal stress protein domain containing protein, putative, expressed
LOC_Os06g05910	0.455981	1.47837e-20	17.011	20.9542	7.60572	8.61765	methyltransferase domain containing protein, expressed
LOC_Os06g36670	0.457836	1.38297e-07	4.39311	4.72732	1.33598	1.75536	bet v I allergen family protein, putative, expressed
LOC_Os02g02400	0.45792	4.33292e-12	9.22722	10.5508	4.71325	3.25935	catalase isozyme A, putative, expressed
LOC_Os04g51680	0.458508	0.0492958	1.42523	1.83381	0.41131	0	expressed protein
LOC_Os03g03660	0.45856	9.69752e-13	105.269	107.164	42.0241	54.3064	CAMK_CAMK_like.17 - CAMK includes calcium/calmodulin depedent protein kinases, expressed
LOC_Os05g44340	0.458593	2.86363e-08	257.187	240.161	139.879	87.1193	heat shock protein 101, putative, expressed
LOC_Os02g54140	0.458941	9.09891e-09	344.969	295.548	178.338	114.539	hsp20/alpha crystallin family protein, putative, expressed
LOC_Os01g55310	0.45904	3.48091e-09	12.0776	17.2542	5.79026	6.59233	haloacid dehalogenase-like hydrolase domain-containing protein 1A, putative, expressed
LOC_Os02g11790	0.459098	3.59038e-12	49.7961	56.3761	19.1126	28.5491	OsFBK4 - F-box domain and kelch repeat containing protein, expressed
LOC_Os03g15960	0.459271	2.58736e-07	670.511	646.521	387.218	216.576	hsp20/alpha crystallin family protein, putative, expressed
LOC_Os01g08860	0.46113	1.09439e-07	331.373	287.35	181.313	102.921	hsp20/alpha crystallin family protein, putative, expressed
LOC_Os01g41900	0.461959	2.42658e-20	29.6483	24.5881	13.1712	10.8078	Myb transcription factor, putative, expressed
LOC_Os03g04020	0.463239	5.88346e-10	66.3297	60.425	21.27	36.3741	expansin precursor, putative, expressed
LOC_Os02g58150	0.46452	3.36185e-07	3.20315	5.54474	1.31166	1.68096	expressed protein
LOC_Os03g29540	0.464589	7.82713e-23	15.493	16.7505	6.62076	7.28841	ATP-dependent protease, putative, expressed
LOC_Os01g55940	0.467843	0.0238808	11.3564	10.7707	1.18082	8.1069	OsGH3.2 - Probable indole-3-acetic acid-amido synthetase, expressed
LOC_Os01g37832	0.468176	9.75884e-22	78.5376	78.7967	34.9411	37.6555	thioredoxin, putative, expressed
LOC_Os08g38880	0.468659	5.56541e-13	261.019	263.699	113.561	131.29	WD-40 repeat family protein, putative, expressed
LOC_Os01g72810	0.470011	4.59304e-06	10.7881	9.09285	2.40184	5.88244	secreted glycoprotein, putative, expressed
LOC_Os02g10780	0.472131	4.53839e-12	43.3671	45.7786	24.3203	16.7124	SPX domain containing protein, putative, expressed
LOC_Os07g11510	0.474339	9.21919e-08	174.94	304.507	121.353	105.016	RAL6 - Seed allergenic protein RA5/RA14/RA17 precursor, expressed
LOC_Os02g34250	0.474395	2.79427e-05	5.23287	4.79111	2.47411	1.23001	expressed protein
LOC_Os08g39140	0.475085	6.25037e-09	138.668	141.571	78.1167	53.9703	heat shock protein, putative, expressed
LOC_Os01g64480	0.475922	0.000242122	3.96202	5.22057	1.06718	2.25485	harpin-induced protein 1 domain containing protein, expressed
LOC_Os03g16040	0.476383	1.98442e-06	35.6408	33.8338	20.9151	11.1342	hsp20/alpha crystallin family protein, putative, expressed
LOC_Os12g36910	0.477687	4.19134e-09	12.1089	11.9879	3.65802	6.80808	calmodulin binding protein, putative, expressed
LOC_Os05g41970	0.478502	1.03561e-07	298.477	467.673	205.608	159.953	SSA1 - 2S albumin seed storage family protein precursor, expressed
LOC_Os01g67030	0.479676	1.19023e-07	12.951	14.4774	3.92445	8.19167	auxin-responsive protein, putative, expressed
LOC_Os03g13160	0.480286	0.000144224	3.00858	3.23222	0.491586	1.46636	non-symbiotic hemoglobin 2, putative, expressed
LOC_Os07g34720	0.482176	0.000588063	1.62518	2.2671	0.0497441	0.791375	harpin-induced protein 1 domain containing protein, expressed
LOC_Os09g28440	0.48424	0.000666694	3.83811	5.68147	0.807663	2.77058	AP2 domain containing protein, expressed
LOC_Os05g44922	0.484629	3.13354e-08	376.016	363.963	140.077	217.508	6-phosphofructokinase, putative, expressed
LOC_Os03g57490	0.485238	0.000410961	16.8878	21.8398	4.37146	13.3912	fasciclin domain containing protein, expressed
LOC_Os02g33060	0.48581	3.99398e-08	18.3814	24.4059	7.41036	12.3478	expressed protein
LOC_Os04g38680	0.486045	2.91286e-17	11.6021	13.6612	5.19774	6.05344	transmembrane amino acid transporter protein, putative, expressed
LOC_Os10g42410	0.486404	1.12237e-10	4.17326	3.6101	1.03596	1.7227	zinc-binding protein, putative, expressed
LOC_Os09g31300	0.487946	3.15982e-12	17.5122	14.9622	6.3309	8.49075	helix-loop-helix DNA-binding domain containing protein, expressed
LOC_Os08g35210	0.488728	2.07566e-17	1.38234	1.6065	0.270245	0.167941	ferric reductase, putative, expressed
LOC_Os03g55980	0.490713	1.18379e-06	23.4633	27.1076	8.31351	15.4837	expressed protein
LOC_Os05g15530	0.491037	5.38628e-18	44.7401	42.6195	18.4309	23.4479	aminotransferase domain containing protein, putative, expressed
LOC_Os05g47870	0.491635	1.0031e-10	24.3975	25.8604	13.8447	9.84714	expressed protein
LOC_Os06g04950	0.492975	6.70249e-12	268.833	260.592	111.837	148.142	early nodulin 93 ENOD93 protein, putative, expressed
LOC_Os10g37830	0.493871	1.05153e-18	58.0725	61.5347	25.0218	33.0365	OsFBX391 - F-box domain containing protein, expressed
LOC_Os11g02830	0.49488	1.74831e-18	43.7269	46.6191	18.5397	25.1605	protein kinase domain containing protein, expressed
LOC_Os01g64520	0.495426	1.18392e-18	93.7174	106.439	49.3243	48.8292	uricase, putative, expressed
LOC_Os01g65920	0.496814	1.43742e-10	298.689	289.271	132.825	158.276	F-box/LRR-repeat protein 2, putative, expressed
LOC_Os07g40290	0.49691	7.22823e-08	246.35	250.001	95.6097	150.026	OsGH3.8 - Probable indole-3-acetic acid-amido synthetase, expressed
LOC_Os11g40590	0.496939	4.0683e-07	26.4364	44.5774	19.5571	14.7263	DUF1399 containing protein, putative, expressed
LOC_Os09g35790	0.497202	9.34851e-08	30.8437	30.24	18.2517	11.1136	HSF-type DNA-binding domain containing protein, expressed
LOC_Os08g09690	0.497227	1.81926e-11	20.295	21.0094	10.7966	8.73549	nuclear transcription factor Y subunit, putative, expressed
LOC_Os10g39140	0.497371	7.69803e-11	50.4124	61.1507	30.447	24.0359	flavonol synthase/flavanone 3-hydroxylase, putative, expressed
LOC_Os02g15930	0.49748	2.73677e-17	32.7904	26.4013	15.3187	13.123	expressed protein
LOC_Os01g54450	0.497704	0.000429748	9.90722	7.09341	2.5221	4.93459	DUF584 domain containing protein, putative, expressed
LOC_Os12g40180	0.499085	0.000933901	52.9852	98.7968	21.6066	53.1437	expressed protein
LOC_Os01g55510	2.00035	0.0330869	10.229	15.9986	14.8484	39.6164	dynein light chain type 1 domain containing protein, expressed
LOC_Os04g44340	2.00375	9.02234e-05	0.319456	0.42626	1.43411	2.06762	expressed protein
LOC_Os01g05650	2.00414	1.30658e-06	102.364	81.5112	187.662	182.859	metallothionein, putative, expressed
LOC_Os07g43580	2.00587	1.81034e-05	3.89145	3.17042	7.50856	8.66837	MYB family transcription factor, putative, expressed
LOC_Os02g14980	2.00794	1.64237e-10	8.62886	8.28628	19.7599	16.2205	calcium-binding EF hand family protein, putative, expressed
LOC_Os03g60100	2.00835	0.000627067	7.40498	9.17281	13.2717	22.039	50S ribosomal protein L17, putative, expressed
LOC_Os01g54430	2.00864	0.00148682	0.736584	0.607054	2.88849	1.82767	plastocyanin-like domain containing protein, putative, expressed
LOC_Os01g71190	2.00925	0.00367527	0.791145	0.978031	1.97429	3.59892	photosystem II reaction center PSB28 protein, chloroplast precursor, putative, expressed
LOC_Os11g31980	2.01099	9.15336e-05	1.15902	2.38422	5.11638	4.03101	OsSCP63 - Putative Serine Carboxypeptidase homologue, expressed
LOC_Os03g17850	2.01384	0.000226502	1.9174	1.70563	5.56421	3.75968	glycosyltransferase family 43 protein, putative, expressed
LOC_Os05g01970	2.01615	1.08257e-07	5.36735	5.80689	10.6963	13.8649	NAD dependent epimerase/dehydratase family protein, putative, expressed
LOC_Os01g58670	2.0171	0.00162064	11.8994	6.4623	23.4074	15.6643	expressed protein
LOC_Os03g08390	2.02366	1.44409e-07	0.9526	0.778541	3.07903	2.47153	expressed protein
LOC_Os05g18446	2.02523	1.33301e-06	33.3402	26.9995	69.0139	55.2383	retrotransposon protein, putative, Ty3-gypsy subclass, expressed
LOC_Os05g01270	2.02781	2.38763e-05	62.5175	81.1555	123.614	169.783	peptidyl-prolyl cis-trans isomerase, putative, expressed
LOC_Os12g32970	2.02876	6.57164e-06	11.8422	10.425	26.7521	20.4804	membrane associated DUF588 domain containing protein, putative, expressed
LOC_Os01g03330	2.0296	2.49395e-06	0.283275	0.377983	1.93137	1.46992	BBTI3 - Bowman-Birk type bran trypsin inhibitor precursor, expressed
LOC_Os03g02590	2.03193	6.00167e-08	2.41881	2.43634	6.18728	5.74192	peroxisomal biogenesis factor 11, putative, expressed
LOC_Os01g66980	2.03211	0.00200139	0.665079	0.665579	1.59548	3.17279	expressed protein
LOC_Os01g44970	2.0356	1.73713e-10	10.722	10.2047	23.8628	20.8067	polygalacturonase, putative, expressed
LOC_Os03g17070	2.03563	0.000221466	5.73631	5.61848	10.0267	15.1587	ATP synthase B chain, chloroplast precursor, putative, expressed
LOC_Os04g33390	2.03872	8.81577e-06	0.608606	0.450177	1.84421	2.3918	prephenate dehydratase domain containing protein, expressed
LOC_Os02g42310	2.03909	3.05693e-06	0.216553	0.108358	0.692661	2.04803	OsSCP8 - Putative Serine Carboxypeptidase homologue, expressed
LOC_Os03g34040	2.03919	1.7819e-09	5.88282	6.94465	12.5476	15.6885	ribosomal protein, putative, expressed
LOC_Os09g36700	2.03996	2.38638e-07	18.9618	16.146	31.8604	41.8382	ribonuclease T2 family domain containing protein, expressed
LOC_Os02g43600	2.04082	1.58505e-06	7.52206	7.57047	15.6274	17.2554	50S ribosomal protein L19, chloroplast precursor, putative, expressed
LOC_Os10g25060	2.046	8.53063e-05	3.65725	4.39199	7.44975	11.111	expressed protein
LOC_Os10g31330	2.0464	9.48014e-05	4.40825	3.99472	7.99376	11.2949	retrotransposon protein, putative, unclassified, expressed
LOC_Os05g47540	2.04981	0.000805885	1.36862	1.67402	2.25794	6.07853	CPuORF26 - conserved peptide uORF-containing transcript, expressed
LOC_Os04g33820	2.05164	1.08329e-09	9.88583	11.0791	23.0144	22.1013	OsFBX132 - F-box domain containing protein, expressed
LOC_Os04g41540	2.06644	4.55051e-05	1.98897	1.87988	5.05973	5.06792	OsCML22 - Calmodulin-related calcium sensor protein, expressed
LOC_Os03g52680	2.06892	0.00794906	1.63433	2.75071	3.3016	7.90857	expressed protein
LOC_Os01g41010	2.07137	1.12999e-06	3.40718	2.97994	8.09766	7.27517	DUF581 domain containing protein, expressed
LOC_Os01g58150	2.08117	0.00248929	0.327499	0.374565	0.945138	2.67831	expressed protein
LOC_Os02g56940	2.08263	0.000709092	1.29348	1.34954	2.36284	5.30687	expressed protein
LOC_Os12g08730	2.08491	1.76051e-06	2.56376	2.23675	5.34518	6.83326	thioredoxin, putative, expressed
LOC_Os08g45190	2.08748	0.000338158	0.320009	0.183	1.9394	1.28557	PGR5, putative, expressed
LOC_Os01g39960	2.08773	0.0323936	0	0	0.697955	1.47751	lycopene epsilon cyclase, chloroplast precursor, putative, expressed
LOC_Os05g50930	2.08935	1.04458e-08	0.358033	0.497641	1.94884	2.01765	RNA polymerase sigma factor, putative, expressed
LOC_Os10g10180	2.09537	0.0456531	0	0	0.434369	1.75638	methyltransferase domain containing protein, putative, expressed
LOC_Os03g20600	2.09934	0.000781884	0.227278	0.170587	1.66437	1.36957	expressed protein
LOC_Os01g45914	2.09968	0.00203495	1.66934	1.09452	4.3026	3.69999	expressed protein
LOC_Os03g52130	2.10034	0.00172033	1.16866	1.29264	3.35491	4.01533	expressed protein
LOC_Os02g58360	2.10119	1.77374e-13	0.477196	0.468003	1.62917	2.55925	expressed protein
LOC_Os06g18010	2.10208	2.63891e-06	2.27755	2.7948	7.17535	5.69127	UDP-glucoronosyl and UDP-glucosyl transferase domain containing protein, expressed
LOC_Os01g67810	2.10425	0.00723303	0.239249	0.435325	0.329536	3.29845	transposon protein, putative, unclassified, expressed
LOC_Os05g39450	2.11277	0.000221417	1.14952	0.519527	2.92148	2.83037	glutaredoxin, putative, expressed
LOC_Os02g54890	2.11743	1.79649e-08	1.70443	1.87417	4.84598	4.96633	UDP-glucuronate 4-epimerase, putative, expressed
LOC_Os03g16050	2.11951	8.61324e-05	0.0293777	0.0293997	0.563799	1.79979	fructose-1,6-bisphosphatase, putative, expressed
LOC_Os02g17920	2.12359	1.14177e-06	2.84716	3.02737	7.36934	7.35292	glyoxalase family protein, putative, expressed
LOC_Os03g04660	2.12549	0.00175768	4.57293	4.28776	15.1262	5.95811	cytochrome P450 86A1, putative, expressed
LOC_Os01g59060	2.12915	9.98989e-06	5.061	5.82161	12.8094	12.6196	50S ribosomal protein, putative, expressed
LOC_Os03g25760	2.12936	0.000711488	2.6387	3.20654	4.31523	10.3901	calmodulin-binding protein, putative, expressed
LOC_Os08g35190	2.13007	2.48465e-05	0.301034	0.438197	2.51547	1.31929	auxin-repressed protein, putative, expressed
LOC_Os07g47640	2.13141	1.52286e-09	11.5917	12.4748	25.7115	27.8467	ultraviolet-B-repressible protein, putative, expressed
LOC_Os07g34570	2.13356	8.53445e-07	108.257	104.785	200.62	256.184	FAD dependent oxidoreductase domain containing protein, expressed
LOC_Os10g38940	2.13508	8.20224e-06	4.57795	5.40754	12.9247	10.6653	fatty acid hydroxylase, putative, expressed
LOC_Os10g31530	2.14026	9.04106e-05	2.17115	1.92013	5.76306	5.27386	glycine-rich cell wall protein, putative, expressed
LOC_Os05g03750	2.14738	4.81824e-05	0.503185	0.503563	1.6603	2.79633	expressed protein
LOC_Os07g37400	2.15098	7.31716e-06	6.44966	5.2089	11.8483	15.531	OsFBX257 - F-box domain containing protein, expressed
LOC_Os09g16030	2.15333	9.70597e-08	0.74246	0.941155	2.87477	3.05725	cytokinin-O-glucosyltransferase 1, putative, expressed
LOC_Os02g46180	2.15359	0.0028148	0	0.0418757	0.338127	2.05924	DUF581 domain containing protein, expressed
LOC_Os02g51020	2.15432	3.34808e-05	1.37173	1.24796	3.56883	4.38346	expressed protein
LOC_Os05g46040	2.16093	4.66078e-09	1.59173	1.23497	4.20911	4.22107	protein phosphatase 2C, putative, expressed
LOC_Os05g01110	2.16235	1.57007e-05	6.97409	10.4169	17.5583	22.3718	ribosomal protein L28 protein, putative, expressed
LOC_Os02g49870	2.16279	0.024008	0	0	0.875204	1.45037	expressed protein
LOC_Os08g06530	2.17065	0.000231236	0.466052	0.636003	1.7974	2.93606	rubredoxin family protein, putative, expressed
LOC_Os05g04380	2.17221	0.000311763	0.297151	0.446061	0.800387	3.15845	peroxidase precursor, putative, expressed
LOC_Os05g39770	2.17522	3.51547e-08	3.65146	3.60591	10.3661	7.7707	aminotransferase, putative, expressed
LOC_Os02g22260	2.1763	1.07077e-07	2.43307	2.35635	5.68151	7.0943	fruit protein PKIWI502, putative, expressed
LOC_Os09g26960	2.17803	3.62337e-07	0.774267	0.730571	2.21214	3.42151	cytochrome P450, putative, expressed
LOC_Os09g30160	2.18323	8.30608e-07	33.0863	29.9642	81.846	58.1744	zinc finger, C3HC4 type domain containing protein, expressed
LOC_Os02g57010	2.19471	1.31659e-06	1.1423	1.01614	3.52551	3.60105	RNA recognition motif containing protein, putative, expressed
LOC_Os01g74370	2.20681	0.00012529	0.644587	0.879641	1.71649	4.0608	domain of unknown function DUF966 domain containing protein, expressed
LOC_Os09g25850	2.20706	9.74285e-06	0.733868	0.823982	1.75372	4.09867	WAX2, putative, expressed
LOC_Os10g28360	2.20824	0.0167997	2.38136	1.99877	2.59933	9.4895	1,2-dihydroxy-3-keto-5-methylthiopentene dioxygenase protein, putative, expressed
LOC_Os03g04070	2.21204	0.000179197	0.473613	0.846373	1.70852	3.63542	no apical meristem protein, putative, expressed
LOC_Os08g44870	2.21687	7.42856e-08	2.62427	3.08583	8.30555	6.78672	MATE efflux family protein, putative, expressed
LOC_Os04g32620	2.21768	5.26348e-14	0.113993	0.205341	1.16293	1.9806	ethylene-responsive transcription factor ERF114, putative, expressed
LOC_Os03g03034	2.21951	0.00357657	2.31208	2.31382	2.911	9.79526	flavonol synthase/flavanone 3-hydroxylase, putative, expressed
LOC_Os10g36626	2.22081	0.000563066	2.79744	2.53912	8.67401	5.61908	expressed protein
LOC_Os06g46350	2.22993	1.93133e-06	0.662824	0.92865	3.07971	2.92904	PLA IIIA/PLP7, putative, expressed
LOC_Os06g49160	2.23533	6.99668e-07	2.27849	2.17161	5.62574	6.79238	thylakoid lumenal 16.5 kDa protein, chloroplast precursor, putative, expressed
LOC_Os12g02320	2.23752	2.21952e-06	612.064	442.872	1229.88	1133.03	LTPL12 - Protease inhibitor/seed storage/LTP family protein precursor, expressed
LOC_Os04g56400	2.24061	1.51076e-07	4.77372	5.32275	9.7955	15.308	glutamine synthetase, catalytic domain containing protein, expressed
LOC_Os10g38040	2.24854	1.31254e-06	15.0126	9.65034	30.549	27.4036	lysM domain containing protein, putative, expressed
LOC_Os02g43700	2.25592	2.06465e-10	0.474374	0.49451	2.23605	2.46153	triacylglycerol lipase like protein, putative, expressed
LOC_Os02g52710	2.25727	0.0459926	0	0	0	2.51455	alpha-amylase precursor, putative, expressed
LOC_Os03g55540	2.26464	7.90516e-05	0.376469	0.650752	1.59018	3.26538	ZOS3-18 - C2H2 zinc finger protein, expressed
LOC_Os03g18150	2.26926	1.66771e-13	6.60055	7.33945	15.2499	18.9221	protein phosphatase 2C, putative, expressed
LOC_Os03g06940	2.27756	8.64624e-16	6.39478	6.79243	16.8835	15.7064	beta-galactosidase, putative, expressed
LOC_Os04g51300	2.28197	2.30474e-06	2.30343	2.43322	4.91178	8.46101	peroxidase precursor, putative, expressed
LOC_Os05g13850	2.2823	0.000239052	0.115429	0.288789	1.63228	1.85485	TsetseEP precursor, putative, expressed
LOC_Os02g58350	2.2825	0.000281603	0.707427	0.353979	2.50094	2.4867	OsRR3 type-A response regulator, expressed
LOC_Os01g54400	2.28458	5.4369e-07	1.26797	1.40249	4.21296	4.45707	VQ domain containing protein, putative, expressed
LOC_Os05g29900	2.29106	8.27487e-06	3.83008	2.43506	9.83098	7.10499	expressed protein
LOC_Os01g52100	2.29181	2.79181e-14	20.5049	16.4468	44.6688	42.601	DUF581 domain containing protein, expressed
LOC_Os07g37420	2.29682	0.000899333	0.201551	0.363064	0.692177	3.19828	versicolorin reductase, putative, expressed
LOC_Os02g15660	2.30264	3.04029e-06	1.75404	1.71289	3.27196	7.31645	tetratricopeptide repeat, putative, expressed
LOC_Os07g46990	2.30292	9.85325e-10	82.6899	64.3568	168.589	172.654	copper/zinc superoxide dismutase, putative, expressed
LOC_Os03g43100	2.30381	0.0487541	0	0	1.26918	1.33844	expressed protein
LOC_Os07g47990	2.30636	0.000577195	0.507957	0.561848	0.945138	4.13493	peroxidase precursor, putative, expressed
LOC_Os05g46020	2.31834	0.000215893	1.39917	0.954694	2.40897	5.68475	WRKY7, expressed
LOC_Os06g08080	2.32434	5.14785e-16	29.7267	33.0085	73.5827	74.8839	inorganic H+ pyrophosphatase, putative, expressed
LOC_Os11g02610	2.32478	1.51344e-10	0.0546315	0.21869	1.96816	1.31683	BTBN20 - Bric-a-Brac, Tramtrack, Broad Complex BTB domain with non-phototropic hypocotyl 3 NPH3 and coiled-coil domains, expressed
LOC_Os03g39830	2.33185	0.0003859	2.76465	3.07414	5.37815	10.9008	expressed protein
LOC_Os01g49310	2.33621	7.1047e-08	1.82637	1.3112	3.56922	6.43322	expressed protein
LOC_Os06g14324	2.33646	2.17408e-11	1.67175	1.53992	4.682	5.49484	caleosin related protein, putative, expressed
LOC_Os02g26720	2.33957	2.79133e-09	15.0661	12.6639	38.6323	28.9233	Inositol 1, 3, 4-trisphosphate 5/6-kinase, putative, expressed
LOC_Os02g50600	2.34941	0.000110476	0.497775	0.473241	1.03072	3.94943	glycosyl transferase 8 domain containing protein, putative, expressed
LOC_Os06g40940	2.35175	7.10211e-10	1.45624	1.48162	3.65276	5.95984	glycine dehydrogenase, putative, expressed
LOC_Os03g19720	2.3539	0.00217524	0.505499	0.505878	2.04237	3.04611	EF hand family protein, putative, expressed
LOC_Os02g06290	2.35584	1.66463e-06	0.0306043	0.0612545	1.42198	1.5061	rhodanese-like domain containing protein, putative, expressed
LOC_Os05g45460	2.36076	0.0105693	1.182	3.91575	10.6216	4.13441	POEI52 - Pollen Ole e I allergen and extensin family protein precursor, expressed
LOC_Os07g37030	2.36975	4.09712e-09	6.07688	7.83909	15.0437	20.6732	cytochrome b6-f complex iron-sulfur subunit, chloroplast precursor, putative, expressed
LOC_Os02g33450	2.37055	5.04302e-16	15.2263	18.8215	41.9753	41.4776	peroxiredoxin, putative, expressed
LOC_Os05g33140	2.37791	4.85553e-07	1.23016	0.649741	3.348	3.87805	CHIT5 - Chitinase family protein precursor, expressed
LOC_Os05g03620	2.39314	8.2934e-09	1.83579	2.46567	5.02608	8.05418	TKL_IRAK_CR4L.4 - The CR4L subfamily has homology with Crinkly4, expressed
LOC_Os10g40730	2.41342	4.13559e-09	4.24471	4.81249	13.8122	10.8735	expansin precursor, putative, expressed
LOC_Os01g03680	2.41658	5.03726e-05	0.750635	0.839575	4.23699	2.43903	BBTI8 - Bowman-Birk type bran trypsin inhibitor precursor, expressed
LOC_Os10g41780	2.41674	2.42681e-12	4.33949	4.08729	13.4934	9.70537	chlorophyllide a oxygenase, chloroplast precursor, putative, expressed
LOC_Os03g46570	2.41748	7.21625e-09	7.74659	7.19618	22.4914	16.4673	protein binding protein, putative, expressed
LOC_Os06g04150	2.41893	7.34558e-07	0.329563	0.403102	2.2932	2.31692	magnesium-protoporphyrin O-methyltransferase, putative, expressed
LOC_Os03g63480	2.42135	3.92894e-09	2.39106	3.21896	7.99299	8.43349	ankyrin repeat domain containing protein, expressed
LOC_Os05g10670	2.42136	7.86236e-11	15.8142	12.751	39.1628	32.8463	zinc finger CCCH type family protein, putative, expressed
LOC_Os06g40530	2.42238	2.94738e-06	2.0198	1.06787	5.00415	5.32014	transposon protein, putative, CACTA, En/Spm sub-class, expressed
LOC_Os03g02960	2.42247	2.94912e-10	3.23809	2.80386	7.84045	9.64098	nascent polypeptide-associated complex subunit alpha, putative, expressed
LOC_Os02g43540	2.4381	6.59403e-10	4.85155	4.36068	12.5687	12.7678	retrotransposon protein, putative, unclassified, expressed
LOC_Os01g59080	2.45238	6.3286e-08	9.47502	8.7665	18.4187	29.2213	expressed protein
LOC_Os10g37760	2.46754	6.4938e-05	0.209706	0.419727	0.907796	3.58043	OsRhmbd17 - Putative Rhomboid homologue, expressed
LOC_Os02g51040	2.46901	1.04252e-12	67.8498	55.4029	151.16	156.09	expansin precursor, putative, expressed
LOC_Os03g56160	2.47273	4.35305e-05	0	0.0194827	0.37362	2.62001	lectin-like receptor kinase 7, putative, expressed
LOC_Os02g03010	2.47616	5.85379e-08	1.68536	1.27293	4.52887	5.74863	expressed protein
LOC_Os05g33280	2.47805	0.000140117	0	0.0311035	0.941798	2.09138	thylakoid lumen protein, putative, expressed
LOC_Os12g13910	2.48468	1.91628e-08	3.38942	2.69114	7.80912	10.2685	expressed protein
LOC_Os10g25570	2.48933	1.57007e-05	0.122959	0.28712	1.15918	2.84029	expressed protein
LOC_Os08g37370	2.50503	6.49685e-13	4.16122	5.03532	12.4721	13.5756	mitochondrial carrier protein, putative, expressed
LOC_Os11g09010	2.52049	8.32467e-13	2.63281	3.43216	7.80306	10.5246	lipase, putative, expressed
LOC_Os09g27030	2.52919	8.9799e-05	1.22956	0.915712	2.1662	6.31801	oryzain gamma chain precursor, putative, expressed
LOC_Os06g46950	2.53081	6.07348e-05	5.05375	6.13362	10.0464	21.3284	EF hand family protein, putative, expressed
LOC_Os12g41110	2.53215	3.33082e-06	0.141866	0.283944	1.86284	2.27967	OsCML5 - Calmodulin-related calcium sensor protein, expressed
LOC_Os02g09940	2.53279	7.22823e-08	1.8429	1.67662	5.83825	6.14154	peroxiredoxin, putative, expressed
LOC_Os02g51470	2.53592	8.63405e-09	2.12106	2.23013	5.34251	8.76361	ATP synthase F1, delta subunit family protein, putative, expressed
LOC_Os01g15000	2.54769	6.18731e-13	1.41348	1.36631	5.37016	4.80725	lipase, putative, expressed
LOC_Os10g40550	2.55084	1.15562e-10	1.95267	1.47646	6.7717	5.0771	CPuORF23 - conserved peptide uORF-containing transcript, expressed
LOC_Os02g39930	2.55647	6.11172e-05	0.41144	0.457499	1.47764	3.85672	OsTIL-1 Temperature-induced lipocalin-1, expressed
LOC_Os03g57220	2.56301	3.87513e-08	0.337949	0.157828	1.22887	3.16783	hydroxyacid oxidase 1, putative, expressed
LOC_Os08g31630	2.57694	3.27037e-10	1.59232	1.82116	4.33492	7.61528	uncharacterized glycosyl hydrolase Rv2006/MT2062, putative, expressed
LOC_Os08g39300	2.58004	1.97488e-09	0.0557159	0.0371718	0.881676	2.51806	aminotransferase, putative, expressed
LOC_Os09g31031	2.59196	0.00804839	8.28641	10.1066	10.1136	40.7443	ubiquitin family protein, putative, expressed
LOC_Os01g67820	2.59453	3.90507e-05	0.420254	0.544267	1.04874	4.64279	exo70 exocyst complex subunit domain containing protein, expressed
LOC_Os04g53490	2.60308	1.94228e-06	0.3867	0.35181	1.59789	3.53066	OsCHL Chloroplastic lipocalin, expressed
LOC_Os01g17170	2.61547	9.30216e-21	6.55438	7.63367	21.8017	18.5376	magnesium-protoporphyrin IX monomethyl ester cyclase,chloroplast precursor, putative, expressed
LOC_Os01g72530	2.61912	8.09243e-05	0	0.352444	0.933785	3.22754	OsCML31 - Calmodulin-related calcium sensor protein, expressed
LOC_Os09g24620	2.6241	7.39132e-05	0.076219	0	0.615896	2.8323	expressed protein
LOC_Os02g12480	2.64465	1.10055e-20	1.95401	1.49072	6.15121	6.2482	expressed protein
LOC_Os03g16170	2.64611	7.90048e-21	11.2765	11.4495	34.2653	29.1626	protein phosphatase 2C, putative, expressed
LOC_Os06g45340	2.64809	1.47179e-06	0.210591	0.491747	1.66625	3.48978	peptidyl-prolyl cis-trans isomerase, FKBP-type, putative, expressed
LOC_Os12g07180	2.65171	6.10233e-08	0.0520146	0.0260268	1.81258	1.69779	transposon protein, putative, Pong sub-class, expressed
LOC_Os03g64020	2.65974	5.55531e-13	1.31239	1.39378	4.65316	5.86404	expressed protein
LOC_Os09g08280	2.67952	9.56765e-09	33.1714	27.3381	101.73	63.7656	expressed protein
LOC_Os03g44380	2.68053	3.81404e-19	4.52791	3.41084	11.9577	12.6834	9-cis-epoxycarotenoid dioxygenase 1, chloroplast precursor, putative, expressed
LOC_Os12g37710	2.68502	1.27924e-13	1.46848	1.44424	4.88457	6.30617	PsbP, putative, expressed
LOC_Os04g19560	2.69654	2.78023e-07	1.21081	0.778963	5.11043	3.64814	retrotransposon protein, putative, Ty3-gypsy subclass
LOC_Os08g37660	2.7033	1.74784e-07	0.471197	1.17888	3.41093	4.4563	plastocyanin-like domain containing protein, putative, expressed
LOC_Os03g47610	2.70575	1.28644e-12	0.96277	0.999178	3.0975	5.62254	thiamine biosynthesis protein thiC, putative, expressed
LOC_Os01g40310	2.71273	1.43549e-05	0.0496931	0.198922	1.30504	2.79485	expressed protein
LOC_Os08g40910	2.71481	1.12477e-05	4.98046	3.66762	18.3191	8.58834	expressed protein
LOC_Os09g27050	2.71565	3.85598e-23	6.63217	6.29885	20.7474	17.8	HD domain containing protein, putative, expressed
LOC_Os04g33920	2.72156	5.67739e-08	2.29097	1.76046	8.38843	6.08089	LTPL102 - Protease inhibitor/seed storage/LTP family protein precursor, expressed
LOC_Os01g51670	2.72377	0.000226451	0.0860634	0.172256	0.391187	3.75995	expressed protein
LOC_Os03g52860	2.73772	0.00122975	6.38516	3.89084	7.02345	24.5848	lipoxygenase, putative, expressed
LOC_Os01g11240	2.73869	4.04993e-21	16.62	14.392	46.1845	42.225	DUF538 domain containing protein, putative, expressed
LOC_Os01g36950	2.74477	3.05579e-10	7.97928	7.57861	16.6044	29.588	N-rich protein, putative, expressed
LOC_Os07g32880	2.75468	1.55899e-10	2.26299	2.8104	7.38063	10.1043	ATP synthase gamma chain, putative, expressed
LOC_Os02g04130	2.76228	0.00475656	0.570618	1.54998	1.44092	7.94134	DUF1645 domain containing protein, putative, expressed
LOC_Os02g05470	2.76267	8.36927e-17	0.146901	0.257269	2.28135	2.36058	CCT motif family protein, expressed
LOC_Os04g52260	2.76997	0.000171588	0.559412	0.818216	1.56475	5.79119	LTPL124 - Protease inhibitor/seed storage/LTP family protein precursor, expressed
LOC_Os07g30670	2.78536	2.61392e-06	0.0734197	0.0367374	1.11239	2.76515	2Fe-2S iron-sulfur cluster binding domain containing protein, expressed
LOC_Os03g20700	2.7972	1.18168e-26	8.889	10.4133	30.1485	27.4384	magnesium-chelatase, putative, expressed
LOC_Os04g43200	2.79805	4.18977e-12	4.89454	4.82565	17.1753	13.6184	caleosin related protein, putative, expressed
LOC_Os12g07210	2.80563	0.0192937	0	0	0.270588	3.34067	expressed protein
LOC_Os09g23300	2.81522	7.22345e-10	4.29057	3.5066	15.0238	10.5574	integral membrane protein, putative, expressed
LOC_Os12g38640	2.82141	4.97739e-06	0.139319	0.0929491	1.2665	3.03164	expressed protein
LOC_Os02g32009	2.82408	0.000436797	0.296483	0.346157	0.698765	4.76425	expressed protein
LOC_Os01g04330	2.83066	2.93211e-12	10.2343	7.87471	23.7467	31.175	OsCML16 - Calmodulin-related calcium sensor protein, expressed
LOC_Os01g64949	2.84979	0.00262548	0	0.0831973	2.18329	1.75339	expressed protein
LOC_Os02g13800	2.88484	1.98696e-12	8.91973	5.82286	25.2388	21.0609	HSF-type DNA-binding domain containing protein, expressed
LOC_Os06g40640	2.896	5.79768e-05	1.26527	0.939454	1.91703	8.25984	fructose-bisphospate aldolase isozyme, putative, expressed
LOC_Os03g61090	2.90042	1.38984e-12	7.13664	6.91011	24.7618	19.7805	expressed protein
LOC_Os07g01480	2.90163	2.2118e-10	0.557803	0.381941	2.43162	4.09842	oxygen evolving enhancer protein 3 domain containing protein, expressed
LOC_Os10g40700	2.92322	1.8959e-06	2.94808	3.85273	7.04157	16.6851	expansin precursor, putative, expressed
LOC_Os10g09240	2.92532	1.55836e-05	1.39298	0.464675	4.35505	4.92983	expressed protein
LOC_Os01g70790	2.95418	1.00617e-13	7.71349	8.90021	20.8734	32.1147	SRC2 protein, putative, expressed
LOC_Os10g35370	3.00834	7.02854e-23	2.33028	1.87156	8.98024	7.67696	oxidoreductase, short chain dehydrogenase/reductase family domain containing family, expressed
LOC_Os01g72950	3.02318	3.33082e-06	0.15288	0.305989	1.49273	3.94088	expressed protein
LOC_Os09g10010	3.03223	1.20366e-09	4.0176	4.95397	12.1742	19.0941	expressed protein
LOC_Os02g32580	3.03689	5.19556e-10	0.718993	0.79948	3.51014	5.17507	expressed protein
LOC_Os09g36040	3.09687	4.80869e-08	0.108499	0.217161	1.4247	3.77758	rhodanese-like domain containing protein, putative, expressed
LOC_Os05g49060	3.10707	8.19369e-17	4.71315	6.27785	16.7963	21.5676	uncharacterized protein ycf23, putative, expressed
LOC_Os05g13940	3.1079	3.30713e-06	4.3284	5.53617	8.86091	26.013	retrotransposon protein, putative, unclassified, expressed
LOC_Os08g34790	3.13462	3.24512e-16	1.43046	1.18185	5.12426	7.33359	AMP-binding domain containing protein, expressed
LOC_Os01g38980	3.16275	1.21523e-10	0.459256	0.661825	2.04109	5.83011	calmodulin-binding protein, putative, expressed
LOC_Os08g37670	3.19095	4.32855e-08	1.69677	1.51447	5.04895	9.57984	plastocyanin-like domain containing protein, putative, expressed
LOC_Os12g23180	3.19637	2.2118e-10	0.0564549	0.310735	1.73922	3.82719	3-beta hydroxysteroid dehydrogenase/isomerase family protein, putative, expressed
LOC_Os01g61080	3.22513	1.41446e-18	0.22386	0.16293	2.7545	2.94321	WRKY24, expressed
LOC_Os05g42070	3.23308	1.58946e-09	0.973691	1.5699	5.51853	7.17129	UDP-glucose flavonoid-O-glucosyltransferase, putative, expressed
LOC_Os05g41640	3.29454	5.53039e-14	5.33783	4.93868	13.3603	25.0851	phosphoglycerate kinase protein, putative, expressed
LOC_Os05g08860	3.31966	3.53024e-05	0.577972	0.841317	1.85753	7.49336	expressed protein
LOC_Os04g16680	3.32877	8.36927e-17	1.0878	0.959023	4.4997	6.97125	fructose-1,6-bisphosphatase, putative, expressed
LOC_Os10g11100	3.34556	1.94112e-22	18.7454	21.0148	77.0823	60.629	retrotransposon protein, putative, unclassified, expressed
LOC_Os12g32610	3.42878	5.919e-13	7.22306	3.88874	21.1487	21.8088	expressed protein
LOC_Os03g47530	3.44006	6.05373e-10	0.362306	0.557812	2.13944	5.90594	glycosyl transferase 8 domain containing protein, putative, expressed
LOC_Os01g67120	3.46456	4.92491e-18	0.803258	1.0779	4.20427	7.24226	rhodanese-like domain containing protein, putative, expressed
LOC_Os02g01340	3.47009	2.17408e-11	0.0281552	0.197234	1.82009	3.90222	ferredoxin--NADP reductase, chloroplast precursor, putative, expressed
LOC_Os06g42680	3.48446	2.75308e-16	3.3261	2.69457	12.6918	13.2559	phytosulfokines 1 precursor, putative, expressed
LOC_Os09g36930	3.52957	0.0204337	0	0	0.471494	4.58764	aquaporin protein, putative, expressed
LOC_Os02g44230	3.58282	0.00065411	1.35895	1.85237	1.91696	14.7542	CPuORF22 - conserved peptide uORF-containing transcript, expressed
LOC_Os05g27730	3.59887	2.64967e-17	10.47	9.60827	29.3717	48.0852	WRKY53, expressed
LOC_Os01g17050	3.63357	1.46859e-14	8.89885	10.5834	27.1392	48.9179	VQ domain containing protein, putative, expressed
LOC_Os03g50310	3.7059	5.90878e-07	0.0214007	0	1.81577	3.67534	CCT/B-box zinc finger protein, putative, expressed
LOC_Os02g09990	3.72178	2.1769e-09	1.16875	1.97166	4.82329	12.3082	expressed protein
LOC_Os04g42120	3.73993	3.01629e-26	2.52019	2.31758	11.1226	12.4502	N-acetyltransferase ESCO2, putative, expressed
LOC_Os02g45710	3.84064	8.47229e-11	0.342778	0.377338	2.21588	6.23111	zinc finger, C3HC4 type domain containing protein, expressed
LOC_Os10g41550	3.96132	6.1606e-21	2.66348	2.68614	16.6216	10.4926	beta-amylase, putative, expressed
LOC_Os10g41330	4.09659	5.50233e-06	0	0.0299397	1.05765	5.25817	AP2 domain containing protein, expressed
LOC_Os05g03760	4.12375	2.07937e-15	2.87369	3.74952	10.3797	23.1803	zinc finger family protein, putative, expressed
LOC_Os01g62060	4.15696	0.0261435	0	0	0.7223	5.59161	plant-specific domain TIGR01589 family protein, expressed
LOC_Os06g04230	4.25362	8.185e-05	0.425323	1.36205	2.4058	11.7043	expressed protein
LOC_Os10g40440	4.33928	0.0257666	1.00458	1.3963	0.169117	16.9276	LTPL140 - Protease inhibitor/seed storage/LTP family protein precursor, expressed
LOC_Os02g37060	4.39584	2.56748e-10	0.63072	0.344287	3.70661	7.37103	photosystem II 5 kDa protein, chloroplast precursor, putative, expressed
LOC_Os01g09220	4.40276	8.83174e-05	0.599487	1.9438	2.25256	15.7504	transposon protein, putative, CACTA, En/Spm sub-class, expressed
LOC_Os08g10500	4.47008	7.98794e-12	6.69236	5.10277	23.4983	36.167	expressed protein
LOC_Os01g14410	4.47503	3.94345e-21	3.48889	2.8024	19.3359	15.7679	early light-induced protein, chloroplast precursor, putative, expressed
LOC_Os08g41750	4.51408	4.6131e-16	1.69451	1.02535	12.4985	6.80735	OsFBX303 - F-box domain containing protein, expressed
LOC_Os02g47020	4.59199	7.34968e-11	0.024111	0.0482581	1.68042	5.83587	phosphoribulokinase/Uridine kinase family protein, expressed
LOC_Os03g21560	4.63065	2.31041e-19	1.16592	1.12012	8.52628	9.32084	photosystem II 11 kD protein, putative, expressed
LOC_Os11g47970	4.64263	1.0101e-19	0.470861	0.125657	5.13653	4.91813	AAA-type ATPase family protein, putative, expressed
LOC_Os02g49680	4.65486	3.9166e-14	0.250947	0.313919	2.69317	7.24592	arsenate reductase, putative, expressed
LOC_Os07g28610	4.75448	8.46487e-11	0.0583268	0.175112	1.35503	7.2638	expressed protein
LOC_Os03g22370	4.78059	3.76083e-06	0.115278	0	1.39727	6.71502	ultraviolet-B-repressible protein, putative, expressed
LOC_Os08g31580	4.88702	4.03569e-57	7.26958	6.60429	36.8443	38.7317	ethylene-responsive transcription factor, putative, expressed
LOC_Os10g40720	4.89816	8.9478e-17	0.558351	0.690246	4.37911	9.53303	expansin precursor, putative, expressed
LOC_Os02g34810	4.99108	6.68333e-12	0.096391	0.28939	1.58213	8.32548	OsAPx8 - Thylakoid-bound Ascorbate Peroxidase encoding gene 5,8, expressed
LOC_Os02g28334	5.49549	3.41126e-09	0.111904	0.0559941	4.12566	5.788	expressed protein
LOC_Os12g08770	5.52076	1.157e-06	0.050261	0.0502987	1.01535	8.58133	photosystem I reaction center subunit N, chloroplast precursor, putative, expressed
LOC_Os10g37180	5.6732	2.65298e-16	0.470861	0.612578	5.13653	10.3565	glycine cleavage system H protein, putative, expressed
LOC_Os09g30340	5.70883	4.55109e-15	0.137777	0.110304	2.31014	8.52377	photosystem I reaction center subunit, chloroplast precursor, putative, expressed
LOC_Os08g08130	5.74888	3.26381e-19	0.0280653	0.168518	5.21605	5.41185	transposon protein, putative, Pong sub-class, expressed
LOC_Os03g19380	6.18318	1.56201e-30	4.94483	6.30611	29.1281	50.8049	calvin cycle protein CP12, putative, expressed
LOC_Os01g56680	6.29898	6.67355e-17	0.510678	0.300624	3.51973	12.1886	photosystem II reaction center W protein, chloroplast precursor, putative, expressed
LOC_Os07g08160	6.30736	4.78617e-35	3.42622	3.58232	30.6301	24.19	early light-induced protein, chloroplast precursor, putative, expressed
LOC_Os01g64960	6.81677	1.36429e-15	0.0594302	0.11895	2.94142	9.90809	chlorophyll A-B binding protein, putative, expressed
LOC_Os11g40530	7.13934	9.37167e-34	6.22336	9.0514	71.7449	49.5855	LTPL162 - Protease inhibitor/seed storage/LTP family protein precursor, expressed
LOC_Os08g05780	7.20289	6.39296e-78	4.39007	6.765	42.5771	50.1774	expressed protein
LOC_Os12g19470	7.21447	1.19357e-23	0.0771212	0.0578843	3.97281	9.43012	ribulose bisphosphate carboxylase small chain, chloroplast precursor, putative, expressed
LOC_Os06g01850	7.29034	1.02897e-21	0.326646	0.356608	4.49914	13.0627	ferredoxin--NADP reductase, chloroplast precursor, putative, expressed
LOC_Os04g18710	7.43584	5.79411e-51	10.6008	7.15337	80.6439	64.2452	retrotransposon protein, putative, Ty3-gypsy subclass, expressed
LOC_Os05g48630	7.64839	1.44244e-27	2.05173	1.69618	13.7409	28.2213	expressed protein
LOC_Os03g41890	8.63588	2.0329e-29	1.21679	0.231944	14.573	13.2098	retrotransposon protein, putative, Ty3-gypsy subclass, expressed
LOC_Os03g03720	8.85146	5.87172e-28	0.894779	0.447725	7.4563	20.1297	glyceraldehyde-3-phosphate dehydrogenase, putative, expressed
LOC_Os07g08150	8.85174	4.73134e-52	3.81095	2.63153	41.9964	30.7343	early light-induced protein, chloroplast precursor, putative, expressed
LOC_Os08g01380	9.42217	9.80964e-10	0.0460025	0.046037	2.88089	14.8307	2Fe-2S iron-sulfur cluster binding domain containing protein, expressed
LOC_Os01g35330	9.63733	0.00365442	0	0	7.93686	9.3378	circumsporozoite protein precursor, putative, expressed
LOC_Os06g15400	9.85131	8.77052e-16	0.134354	0.0896362	5.0664	14.8428	expressed protein
LOC_Os02g57280	10.4897	7.76558e-38	0.425826	0.804942	9.19971	22.6902	CBS domain containing membrane protein, putative, expressed
LOC_Os11g13890	10.7597	5.64851e-35	0.757293	0.776345	9.02981	26.9909	chlorophyll A-B binding protein, putative, expressed
LOC_Os12g23200	11.0538	7.65752e-17	0	0.141402	5.24494	16.4258	photosystem I reaction center subunit XI, chloroplast precursor, putative, expressed
LOC_Os10g21670	11.1381	1.73577e-17	0.511377	1.12587	7.74793	30.7639	dehydration stress-induced protein, putative, expressed
LOC_Os04g38600	11.5306	4.11858e-10	0.0249169	0	4.83225	16.5163	glyceraldehyde-3-phosphate dehydrogenase, putative, expressed
LOC_Os05g38680	12.1669	0.00420386	0	0	2.62228	19.7116	plant-specific domain TIGR01589 family protein, expressed
LOC_Os07g38960	12.2544	3.28616e-54	1.12765	0.743782	15.7132	29.7289	chlorophyll A-B binding protein, putative, expressed
LOC_Os07g04840	12.2843	1.45432e-31	1.55218	1.841	18.5815	45.6698	PsbP, putative, expressed
LOC_Os12g17600	13.3681	4.05624e-18	1.36367	1.06143	9.10621	48.0491	ribulose bisphosphate carboxylase small chain, chloroplast precursor, putative, expressed
LOC_Os08g10020	13.8176	1.05476e-12	0	0.0914998	7.06495	19.8346	photosystem II 10 kDa polypeptide, chloroplast precursor, putative, expressed
LOC_Os07g25430	14.3358	2.82866e-31	1.19988	0.783121	15.0179	40.0818	photosystem I reaction center subunit IV A, chloroplast precursor, putative, expressed
LOC_Os04g41640	14.675	0.00423106	0	0	5.8773	21.4727	HEV2 - Hevein family protein precursor, expressed
LOC_Os11g07020	14.7477	1.11222e-41	0.713514	0.411119	11.3565	32.7247	fructose-bisphospate aldolase isozyme, putative, expressed
LOC_Os07g05480	15.3157	9.59409e-29	0.252749	0.404702	11.5904	27.1104	photosystem I reaction center subunit, chloroplast precursor, putative, expressed
LOC_Os07g36080	15.7384	7.59955e-35	0.511377	0.31985	10.4597	32.0993	oxygen evolving enhancer protein 3 domain containing protein, expressed
LOC_Os03g56670	16.5442	8.8676e-20	0.270517	0.116023	5.15258	32.3308	photosystem I reaction center subunit III, chloroplast precursor, putative, expressed
LOC_Os01g31690	16.916	5.4018e-29	0.15831	0.158428	8.60286	28.5872	oxygen-evolving enhancer protein 1, chloroplast precursor, putative, expressed
LOC_Os04g58200	16.9781	3.32861e-11	0.0263501	0	6.68052	25.7231	protochlorophyllide reductase A, chloroplast precursor, putative, expressed
LOC_Os12g19381	18.3021	1.34474e-22	0.0395489	0.158314	9.58737	28.6381	ribulose bisphosphate carboxylase small chain, chloroplast precursor, putative, expressed
LOC_Os07g37240	20.2776	2.26806e-23	0.169539	0.0339332	7.91161	34.7696	chlorophyll A-B binding protein, putative, expressed
LOC_Os08g44680	21.6231	1.65652e-63	0.568309	0.743731	27.8628	41.7538	photosystem I reaction center subunit II, chloroplast precursor, putative, expressed
LOC_Os06g01210	22.7072	4.6437e-17	0.10192	0.0509981	9.98582	36.901	plastocyanin, chloroplast precursor, putative, expressed
LOC_Os04g20730	24.4901	2.19228e-45	0.424034	0.666839	46.3794	27.3164	retrotransposon protein, putative, Ty3-gypsy subclass, expressed
LOC_Os08g33820	25.5378	8.30487e-23	0.102914	0	16.3895	35.3142	chlorophyll A-B binding protein, putative, expressed
LOC_Os07g37550	26.9155	1.8435e-126	0.994486	1.29012	48.1791	65.1431	chlorophyll A-B binding protein, putative, expressed
LOC_Os04g38410	28.8131	1.20287e-85	0.802626	0.720136	32.4565	67.0451	chlorophyll A-B binding protein, putative, expressed
LOC_Os04g33830	29.5693	1.50204e-22	0.172239	0.0574561	17.4554	46.4751	membrane protein, putative, expressed
LOC_Os09g17740	30.8005	1.70285e-50	0.178411	0.148788	22.1356	47.5432	chlorophyll A-B binding protein, putative, expressed
LOC_Os02g10390	30.9127	1.45773e-91	0.444788	0.306021	34.7341	48.3007	chlorophyll A-B binding protein, putative, expressed
LOC_Os07g06834	33.4195	9.54042e-13	0	0.0352655	14.5936	51.4239	expressed protein
LOC_Os06g21590	34.7905	1.56759e-34	0.129443	0.0971554	16.703	58.7615	chlorophyll A-B binding protein, putative, expressed
LOC_Os03g39610	37.5217	7.60463e-27	0.049609	0.0248231	18.3398	57.4964	chlorophyll A-B binding protein, putative, expressed
LOC_Os01g52240	62.6945	2.65224e-38	0.416068	0.999313	32.1919	179.934	chlorophyll A-B binding protein, putative, expressed
LOC_Os03g18779	77.3883	2.02425e-78	0.239013	0.170852	72.7022	111.793	expressed protein
LOC_Os01g41710	92.5907	9.90977e-23	0.0355812	0.0356079	28.5002	161.273	chlorophyll A-B binding protein, putative, expressed
LOC_Os12g13445	193.774	4.67351e-154	0.818202	0.0818817	285.95	274.01	expressed protein
LOC_Os06g24070	253.142	6.02718e-180	0.44333	0.0887326	272.865	366.105	myb-like DNA-binding domain containing protein, expressed
LOC_Os03g02470	286.135	7.95335e-91	0.0795269	0.106115	312.798	310.591	expressed protein
