# Supplementary material for: OsNF-YB7 inactivates OsGLK1 to inhibit chlorophyll biosynthesis in rice embryo
Source: eLife. 2024 Sep 17;13:RP96553. doi: 10.7554/eLife.96553 (PMC11407766; doi:10.7554/eLife.96553)
Supplement: Figure 4—source data 2. [file elife-96553-fig4-data2.xlsx]

## Sheet: Sheet1
Supplemental Table 2. Common DEGs identified from the OsGLK1-OX and osnf-yb7 embryos at 10 DAF
Locus ID	OsGLK1-OX vs. WT - Fold change	osnf-yb7 vs. WT - Fold change	MSU Annotation	Expression changes
LOC_Os01g03330	2.0296	7.96696	BBTI3 - Bowman-Birk type bran trypsin inhibitor precursor, expressed	both induced
LOC_Os01g05650	2.00414	9.38658	metallothionein, putative, expressed	both induced
LOC_Os01g11240	2.73869	3.23494	DUF538 domain containing protein, putative, expressed	both induced
LOC_Os01g14410	4.47503	3.45574	early light-induced protein, chloroplast precursor, putative, expressed	both induced
LOC_Os01g17170	2.61547	21.1135	magnesium-protoporphyrin IX monomethyl ester cyclase,chloroplast precursor, putative, expressed	both induced
LOC_Os01g31690	16.916	204.195	oxygen-evolving enhancer protein 1, chloroplast precursor, putative, expressed	both induced
LOC_Os01g36950	2.74477	24.694	N-rich protein, putative, expressed	both induced
LOC_Os01g38980	3.16275	3.32445	calmodulin-binding protein, putative, expressed	both induced
LOC_Os01g39960	2.08773	8.33704	lycopene epsilon cyclase, chloroplast precursor, putative, expressed	both induced
LOC_Os01g40310	2.71273	7.00847	expressed protein	both induced
LOC_Os01g41010	2.07137	4.7486	DUF581 domain containing protein, expressed	both induced
LOC_Os01g41710	92.5907	298.271	chlorophyll A-B binding protein, putative, expressed	both induced
LOC_Os01g45914	2.09968	3.45632	expressed protein	both induced
LOC_Os01g49310	2.33621	4.42117	expressed protein	both induced
LOC_Os01g52240	62.6945	180.472	chlorophyll A-B binding protein, putative, expressed	both induced
LOC_Os01g54400	2.28458	2.6205	VQ domain containing protein, putative, expressed	both induced
LOC_Os01g55510	2.00035	9.00751	dynein light chain type 1 domain containing protein, expressed	both induced
LOC_Os01g56680	6.29898	44.2862	photosystem II reaction center W protein, chloroplast precursor, putative, expressed	both induced
LOC_Os01g58150	2.08117	3.10956	expressed protein	both induced
LOC_Os01g59060	2.12915	6.06931	50S ribosomal protein, putative, expressed	both induced
LOC_Os01g59080	2.45238	5.9947	expressed protein	both induced
LOC_Os01g64960	6.81677	47.7047	chlorophyll A-B binding protein, putative, expressed	both induced
LOC_Os01g66980	2.03211	2.99708	expressed protein	both induced
LOC_Os01g67120	3.46456	11.2217	rhodanese-like domain containing protein, putative, expressed	both induced
LOC_Os01g71190	2.00925	7.72515	photosystem II reaction center PSB28 protein, chloroplast precursor, putative, expressed	both induced
LOC_Os01g72950	3.02318	9.59244	expressed protein	both induced
LOC_Os01g74370	2.20681	2.59359	domain of unknown function DUF966 domain containing protein, expressed	both induced
LOC_Os02g01340	3.47009	18.2174	ferredoxin--NADP reductase, chloroplast precursor, putative, expressed	both induced
LOC_Os02g03010	2.47616	8.4946	expressed protein	both induced
LOC_Os02g05470	2.76267	10.0826	CCT motif family protein, expressed	both induced
LOC_Os02g06290	2.35584	7.79254	rhodanese-like domain containing protein, putative, expressed	both induced
LOC_Os02g09940	2.53279	2.70138	peroxiredoxin, putative, expressed	both induced
LOC_Os02g10390	30.9127	78.5585	chlorophyll A-B binding protein, putative, expressed	both induced
LOC_Os02g12480	2.64465	6.25352	expressed protein	both induced
LOC_Os02g13800	2.88484	2.6464	HSF-type DNA-binding domain containing protein, expressed	both induced
LOC_Os02g15660	2.30264	6.9225	tetratricopeptide repeat, putative, expressed	both induced
LOC_Os02g22260	2.1763	5.26969	fruit protein PKIWI502, putative, expressed	both induced
LOC_Os02g32009	2.82408	5.372	expressed protein	both induced
LOC_Os02g34810	4.99108	24.6641	OsAPx8 - Thylakoid-bound Ascorbate Peroxidase encoding gene 5,8, expressed	both induced
LOC_Os02g37060	4.39584	18.4408	photosystem II 5 kDa protein, chloroplast precursor, putative, expressed	both induced
LOC_Os02g39930	2.55647	32.0471	OsTIL-1 Temperature-induced lipocalin-1, expressed	both induced
LOC_Os02g42310	2.03909	13.8842	OsSCP8 - Putative Serine Carboxypeptidase homologue, expressed	both induced
LOC_Os02g43600	2.04082	4.06005	50S ribosomal protein L19, chloroplast precursor, putative, expressed	both induced
LOC_Os02g44230	3.58282	5.22401	CPuORF22 - conserved peptide uORF-containing transcript, expressed	both induced
LOC_Os02g45710	3.84064	5.5655	zinc finger, C3HC4 type domain containing protein, expressed	both induced
LOC_Os02g46180	2.15359	8.33276	DUF581 domain containing protein, expressed	both induced
LOC_Os02g47020	4.59199	41.3042	phosphoribulokinase/Uridine kinase family protein, expressed	both induced
LOC_Os02g49680	4.65486	18.7279	arsenate reductase, putative, expressed	both induced
LOC_Os02g49870	2.16279	4.57479	expressed protein	both induced
LOC_Os02g50600	2.34941	5.30468	glycosyl transferase 8 domain containing protein, putative, expressed	both induced
LOC_Os02g51020	2.15432	6.28923	expressed protein	both induced
LOC_Os02g51470	2.53592	10.3043	ATP synthase F1, delta subunit family protein, putative, expressed	both induced
LOC_Os02g52710	2.25727	75.7516	alpha-amylase precursor, putative, expressed	both induced
LOC_Os02g56940	2.08263	3.4115	expressed protein	both induced
LOC_Os02g57010	2.19471	4.61624	RNA recognition motif containing protein, putative, expressed	both induced
LOC_Os02g57280	10.4897	24.4135	CBS domain containing membrane protein, putative, expressed	both induced
LOC_Os03g02470	286.135	15.5442	expressed protein	both induced
LOC_Os03g02960	2.42247	4.70436	nascent polypeptide-associated complex subunit alpha, putative, expressed	both induced
LOC_Os03g03034	2.21951	18.3391	flavonol synthase/flavanone 3-hydroxylase, putative, expressed	both induced
LOC_Os03g03720	8.85146	46.5824	glyceraldehyde-3-phosphate dehydrogenase, putative, expressed	both induced
LOC_Os03g17070	2.03563	10.7423	ATP synthase B chain, chloroplast precursor, putative, expressed	both induced
LOC_Os03g18779	77.3883	53.9205	expressed protein	both induced
LOC_Os03g19380	6.18318	20.9118	calvin cycle protein CP12, putative, expressed	both induced
LOC_Os03g20700	2.7972	6.74188	magnesium-chelatase, putative, expressed	both induced
LOC_Os03g21560	4.63065	10.7457	photosystem II 11 kD protein, putative, expressed	both induced
LOC_Os03g22370	4.78059	38.9905	ultraviolet-B-repressible protein, putative, expressed	both induced
LOC_Os03g34040	2.03919	7.08367	ribosomal protein, putative, expressed	both induced
LOC_Os03g39610	37.5217	107.657	chlorophyll A-B binding protein, putative, expressed	both induced
LOC_Os03g39830	2.33185	9.63784	expressed protein	both induced
LOC_Os03g47530	3.44006	2.42108	glycosyl transferase 8 domain containing protein, putative, expressed	both induced
LOC_Os03g47610	2.70575	7.25261	thiamine biosynthesis protein thiC, putative, expressed	both induced
LOC_Os03g50310	3.7059	5.43695	CCT/B-box zinc finger protein, putative, expressed	both induced
LOC_Os03g52130	2.10034	8.51926	expressed protein	both induced
LOC_Os03g52680	2.06892	5.71463	expressed protein	both induced
LOC_Os03g55540	2.26464	4.53442	ZOS3-18 - C2H2 zinc finger protein, expressed	both induced
LOC_Os03g56670	16.5442	75.8236	photosystem I reaction center subunit III, chloroplast precursor, putative, expressed	both induced
LOC_Os03g57220	2.56301	24.6398	hydroxyacid oxidase 1, putative, expressed	both induced
LOC_Os03g60100	2.00835	6.75825	50S ribosomal protein L17, putative, expressed	both induced
LOC_Os03g63480	2.42135	8.55748	ankyrin repeat domain containing protein, expressed	both induced
LOC_Os03g64020	2.65974	3.07744	expressed protein	both induced
LOC_Os04g16680	3.32877	22.5904	fructose-1,6-bisphosphatase, putative, expressed	both induced
LOC_Os04g32620	2.21768	8.11466	ethylene-responsive transcription factor ERF114, putative, expressed	both induced
LOC_Os04g33830	29.5693	100.786	membrane protein, putative, expressed	both induced
LOC_Os04g33920	2.72156	3.32509	LTPL102 - Protease inhibitor/seed storage/LTP family protein precursor, expressed	both induced
LOC_Os04g38410	28.8131	53.0544	chlorophyll A-B binding protein, putative, expressed	both induced
LOC_Os04g38600	11.5306	80.1565	glyceraldehyde-3-phosphate dehydrogenase, putative, expressed	both induced
LOC_Os04g41640	14.675	21.7735	HEV2 - Hevein family protein precursor, expressed	both induced
LOC_Os04g43200	2.79805	2.54735	caleosin related protein, putative, expressed	both induced
LOC_Os04g44340	2.00375	4.63421	expressed protein	both induced
LOC_Os04g51300	2.28197	5.69701	peroxidase precursor, putative, expressed	both induced
LOC_Os04g52260	2.76997	199.983	LTPL124 - Protease inhibitor/seed storage/LTP family protein precursor, expressed	both induced
LOC_Os04g53490	2.60308	10.0354	OsCHL Chloroplastic lipocalin, expressed	both induced
LOC_Os04g56400	2.24061	9.34873	glutamine synthetase, catalytic domain containing protein, expressed	both induced
LOC_Os04g58200	16.9781	45.5401	protochlorophyllide reductase A, chloroplast precursor, putative, expressed	both induced
LOC_Os05g01110	2.16235	7.22339	ribosomal protein L28 protein, putative, expressed	both induced
LOC_Os05g01270	2.02781	3.66018	peptidyl-prolyl cis-trans isomerase, putative, expressed	both induced
LOC_Os05g01970	2.01615	5.287	NAD dependent epimerase/dehydratase family protein, putative, expressed	both induced
LOC_Os05g03750	2.14738	4.843	expressed protein	both induced
LOC_Os05g03760	4.12375	5.78992	zinc finger family protein, putative, expressed	both induced
LOC_Os05g04380	2.17221	209.609	peroxidase precursor, putative, expressed	both induced
LOC_Os05g13940	3.1079	63.6786	retrotransposon protein, putative, unclassified, expressed	both induced
LOC_Os05g27730	3.59887	3.69535	WRKY53, expressed	both induced
LOC_Os05g33140	2.37791	24.8672	CHIT5 - Chitinase family protein precursor, expressed	both induced
LOC_Os05g33280	2.47805	17.9248	thylakoid lumen protein, putative, expressed	both induced
LOC_Os05g39770	2.17522	2.64098	aminotransferase, putative, expressed	both induced
LOC_Os05g41640	3.29454	7.47179	phosphoglycerate kinase protein, putative, expressed	both induced
LOC_Os05g45460	2.36076	3.35593	POEI52 - Pollen Ole e I allergen and extensin family protein precursor, expressed	both induced
LOC_Os05g46040	2.16093	4.11943	protein phosphatase 2C, putative, expressed	both induced
LOC_Os05g47540	2.04981	2.68138	CPuORF26 - conserved peptide uORF-containing transcript, expressed	both induced
LOC_Os05g48630	7.64839	84.9285	expressed protein	both induced
LOC_Os05g49060	3.10707	10.3105	uncharacterized protein ycf23, putative, expressed	both induced
LOC_Os05g50930	2.08935	2.14315	RNA polymerase sigma factor, putative, expressed	both induced
LOC_Os06g01210	22.7072	161.004	plastocyanin, chloroplast precursor, putative, expressed	both induced
LOC_Os06g01850	7.29034	27.129	ferredoxin--NADP reductase, chloroplast precursor, putative, expressed	both induced
LOC_Os06g04150	2.41893	6.84741	magnesium-protoporphyrin O-methyltransferase, putative, expressed	both induced
LOC_Os06g04230	4.25362	20.8982	expressed protein	both induced
LOC_Os06g14324	2.33646	2.9583	caleosin related protein, putative, expressed	both induced
LOC_Os06g15400	9.85131	40.1312	expressed protein	both induced
LOC_Os06g21590	34.7905	100.412	chlorophyll A-B binding protein, putative, expressed	both induced
LOC_Os06g24070	253.142	7.96094	myb-like DNA-binding domain containing protein, expressed	both induced
LOC_Os06g40640	2.896	19.0549	fructose-bisphospate aldolase isozyme, putative, expressed	both induced
LOC_Os06g40940	2.35175	2.88899	glycine dehydrogenase, putative, expressed	both induced
LOC_Os06g45340	2.64809	5.89502	peptidyl-prolyl cis-trans isomerase, FKBP-type, putative, expressed	both induced
LOC_Os06g46950	2.53081	4.43678	EF hand family protein, putative, expressed	both induced
LOC_Os06g49160	2.23533	5.86051	thylakoid lumenal 16.5 kDa protein, chloroplast precursor, putative, expressed	both induced
LOC_Os07g01480	2.90163	6.60807	oxygen evolving enhancer protein 3 domain containing protein, expressed	both induced
LOC_Os07g04840	12.2843	47.8068	PsbP, putative, expressed	both induced
LOC_Os07g05480	15.3157	56.9797	photosystem I reaction center subunit, chloroplast precursor, putative, expressed	both induced
LOC_Os07g08160	6.30736	5.20234	early light-induced protein, chloroplast precursor, putative, expressed	both induced
LOC_Os07g25430	14.3358	67.0593	photosystem I reaction center subunit IV A, chloroplast precursor, putative, expressed	both induced
LOC_Os07g28610	4.75448	16.0384	expressed protein	both induced
LOC_Os07g30670	2.78536	8.42286	2Fe-2S iron-sulfur cluster binding domain containing protein, expressed	both induced
LOC_Os07g32880	2.75468	7.41501	ATP synthase gamma chain, putative, expressed	both induced
LOC_Os07g36080	15.7384	67.6218	oxygen evolving enhancer protein 3 domain containing protein, expressed	both induced
LOC_Os07g37030	2.36975	18.5284	cytochrome b6-f complex iron-sulfur subunit, chloroplast precursor, putative, expressed	both induced
LOC_Os07g37240	20.2776	95.4035	chlorophyll A-B binding protein, putative, expressed	both induced
LOC_Os07g37550	26.9155	73.4408	chlorophyll A-B binding protein, putative, expressed	both induced
LOC_Os07g38960	12.2544	53.7536	chlorophyll A-B binding protein, putative, expressed	both induced
LOC_Os07g46990	2.30292	2.87398	copper/zinc superoxide dismutase, putative, expressed	both induced
LOC_Os07g47640	2.13141	10.5719	ultraviolet-B-repressible protein, putative, expressed	both induced
LOC_Os07g47990	2.30636	70.8566	peroxidase precursor, putative, expressed	both induced
LOC_Os08g01380	9.42217	222.018	2Fe-2S iron-sulfur cluster binding domain containing protein, expressed	both induced
LOC_Os08g06530	2.17065	7.95503	rubredoxin family protein, putative, expressed	both induced
LOC_Os08g10020	13.8176	157.855	photosystem II 10 kDa polypeptide, chloroplast precursor, putative, expressed	both induced
LOC_Os08g31580	4.88702	3.05069	ethylene-responsive transcription factor, putative, expressed	both induced
LOC_Os08g31630	2.57694	2.73145	uncharacterized glycosyl hydrolase Rv2006/MT2062, putative, expressed	both induced
LOC_Os08g33820	25.5378	152.915	chlorophyll A-B binding protein, putative, expressed	both induced
LOC_Os08g37370	2.50503	3.22254	mitochondrial carrier protein, putative, expressed	both induced
LOC_Os08g37670	3.19095	40.9002	plastocyanin-like domain containing protein, putative, expressed	both induced
LOC_Os08g39300	2.58004	25.4751	aminotransferase, putative, expressed	both induced
LOC_Os08g44680	21.6231	54.3924	photosystem I reaction center subunit II, chloroplast precursor, putative, expressed	both induced
LOC_Os08g45190	2.08748	4.66947	PGR5, putative, expressed	both induced
LOC_Os09g10010	3.03223	158.102	expressed protein	both induced
LOC_Os09g17740	30.8005	205.823	chlorophyll A-B binding protein, putative, expressed	both induced
LOC_Os09g24620	2.6241	9.48414	expressed protein	both induced
LOC_Os09g25850	2.20706	5.03922	WAX2, putative, expressed	both induced
LOC_Os09g26960	2.17803	5.22871	cytochrome P450, putative, expressed	both induced
LOC_Os09g27030	2.52919	30.8475	oryzain gamma chain precursor, putative, expressed	both induced
LOC_Os09g30340	5.70883	39.6445	photosystem I reaction center subunit, chloroplast precursor, putative, expressed	both induced
LOC_Os09g31031	2.59196	7.01061	ubiquitin family protein, putative, expressed	both induced
LOC_Os09g36040	3.09687	16.2189	rhodanese-like domain containing protein, putative, expressed	both induced
LOC_Os10g09240	2.92532	17.8765	expressed protein	both induced
LOC_Os10g10180	2.09537	10.959	methyltransferase domain containing protein, putative, expressed	both induced
LOC_Os10g21670	11.1381	492.707	dehydration stress-induced protein, putative, expressed	both induced
LOC_Os10g25570	2.48933	8.98649	expressed protein	both induced
LOC_Os10g31330	2.0464	217.346	retrotransposon protein, putative, unclassified, expressed	both induced
LOC_Os10g31530	2.14026	4.31087	glycine-rich cell wall protein, putative, expressed	both induced
LOC_Os10g35370	3.00834	9.79179	oxidoreductase, short chain dehydrogenase/reductase family domain containing family, expressed	both induced
LOC_Os10g37180	5.6732	15.948	glycine cleavage system H protein, putative, expressed	both induced
LOC_Os10g37760	2.46754	4.02056	OsRhmbd17 - Putative Rhomboid homologue, expressed	both induced
LOC_Os10g40440	4.33928	181.688	LTPL140 - Protease inhibitor/seed storage/LTP family protein precursor, expressed	both induced
LOC_Os10g40700	2.92322	37.1732	expansin precursor, putative, expressed	both induced
LOC_Os10g40720	4.89816	151.411	expansin precursor, putative, expressed	both induced
LOC_Os10g40730	2.41342	15.2131	expansin precursor, putative, expressed	both induced
LOC_Os10g41780	2.41674	3.49767	chlorophyllide a oxygenase, chloroplast precursor, putative, expressed	both induced
LOC_Os11g02610	2.32478	5.26816	BTBN20 - Bric-a-Brac, Tramtrack, Broad Complex BTB domain with non-phototropic hypocotyl 3 NPH3 and coiled-coil domains, expressed	both induced
LOC_Os11g07020	14.7477	91.7819	fructose-bisphospate aldolase isozyme, putative, expressed	both induced
LOC_Os11g13890	10.7597	50.2897	chlorophyll A-B binding protein, putative, expressed	both induced
LOC_Os11g47970	4.64263	26.1889	AAA-type ATPase family protein, putative, expressed	both induced
LOC_Os12g07180	2.65171	2.11531	transposon protein, putative, Pong sub-class, expressed	both induced
LOC_Os12g08730	2.08491	11.3455	thioredoxin, putative, expressed	both induced
LOC_Os12g08770	5.52076	40.3778	photosystem I reaction center subunit N, chloroplast precursor, putative, expressed	both induced
LOC_Os12g13910	2.48468	5.79723	expressed protein	both induced
LOC_Os12g17600	13.3681	21.7423	ribulose bisphosphate carboxylase small chain, chloroplast precursor, putative, expressed	both induced
LOC_Os12g19381	18.3021	189.644	ribulose bisphosphate carboxylase small chain, chloroplast precursor, putative, expressed	both induced
LOC_Os12g19470	7.21447	108.963	ribulose bisphosphate carboxylase small chain, chloroplast precursor, putative, expressed	both induced
LOC_Os12g23180	3.19637	17.2835	3-beta hydroxysteroid dehydrogenase/isomerase family protein, putative, expressed	both induced
LOC_Os12g23200	11.0538	61.5648	photosystem I reaction center subunit XI, chloroplast precursor, putative, expressed	both induced
LOC_Os12g37710	2.68502	4.27854	PsbP, putative, expressed	both induced
LOC_Os12g38640	2.82141	13.6333	expressed protein	both induced
LOC_Os12g41110	2.53215	3.95094	OsCML5 - Calmodulin-related calcium sensor protein, expressed	both induced
LOC_Os01g41900	0.461959	0.443201	Myb transcription factor, putative, expressed	both repressed
LOC_Os02g10780	0.472131	0.320587	SPX domain containing protein, putative, expressed	both repressed
LOC_Os02g15930	0.49748	0.343221	expressed protein	both repressed
LOC_Os02g54140	0.458941	0.109901	hsp20/alpha crystallin family protein, putative, expressed	both repressed
LOC_Os03g15960	0.459271	0.274307	hsp20/alpha crystallin family protein, putative, expressed	both repressed
LOC_Os03g31750	0.429482	0.492094	pyruvate, phosphate dikinase, chloroplast precursor, putative, expressed	both repressed
LOC_Os03g42130	0.439315	0.19494	gibberellin 20 oxidase 2, putative, expressed	both repressed
LOC_Os03g53400	0.372889	0.344696	transmembrane BAX inhibitor motif-containing protein, putative, expressed	both repressed
LOC_Os04g28120	0.307168	0.0921168	response regulator receiver domain containing protein, expressed	both repressed
LOC_Os04g38400	0.434236	0.31244	ethylene-insensitive 3, putative, expressed	both repressed
LOC_Os05g35050	0.380734	0.406451	ctr copper transporter family protein, putative, expressed	both repressed
LOC_Os05g40890	0.43736	0.429098	expressed protein	both repressed
LOC_Os05g44340	0.458593	0.0697741	heat shock protein 101, putative, expressed	both repressed
LOC_Os05g47870	0.491635	0.22891	expressed protein	both repressed
LOC_Os01g04800	0.368984	9.29255	B3 DNA binding domain containing protein, expressed	induced in osnf-yb7, repressed in OsGLK1-OX
LOC_Os01g10950	0.435416	10.5206	peptide-N4-asparagine amidase A, putative, expressed	induced in osnf-yb7, repressed in OsGLK1-OX
LOC_Os01g17330	0.309583	3.72575	eukaryotic translation initiation factor 6, putative, expressed	induced in osnf-yb7, repressed in OsGLK1-OX
LOC_Os01g24030	0.336353	8.65652	AMP-binding enzyme, putative, expressed	induced in osnf-yb7, repressed in OsGLK1-OX
LOC_Os01g36580	0.378562	4.34163	auxin-induced protein 5NG4, putative, expressed	induced in osnf-yb7, repressed in OsGLK1-OX
LOC_Os01g52260	0.364268	3.22921	serine acetyltransferase protein, putative, expressed	induced in osnf-yb7, repressed in OsGLK1-OX
LOC_Os01g52900	0.433569	3.87235	expressed protein	induced in osnf-yb7, repressed in OsGLK1-OX
LOC_Os01g54450	0.497704	6.32844	DUF584 domain containing protein, putative, expressed	induced in osnf-yb7, repressed in OsGLK1-OX
LOC_Os01g55690	0.428398	9.5087	glutelin, putative, expressed	induced in osnf-yb7, repressed in OsGLK1-OX
LOC_Os01g55940	0.467843	27.2411	OsGH3.2 - Probable indole-3-acetic acid-amido synthetase, expressed	induced in osnf-yb7, repressed in OsGLK1-OX
LOC_Os01g60860	0.422897	5.06764	spotted leaf 11, putative, expressed	induced in osnf-yb7, repressed in OsGLK1-OX
LOC_Os01g67030	0.479676	18.8012	auxin-responsive protein, putative, expressed	induced in osnf-yb7, repressed in OsGLK1-OX
LOC_Os01g67950	0.246326	8.47452	ubiquitin family protein, putative, expressed	induced in osnf-yb7, repressed in OsGLK1-OX
LOC_Os01g72810	0.470011	12.995	secreted glycoprotein, putative, expressed	induced in osnf-yb7, repressed in OsGLK1-OX
LOC_Os02g02400	0.45792	35.7406	catalase isozyme A, putative, expressed	induced in osnf-yb7, repressed in OsGLK1-OX
LOC_Os02g11790	0.459098	6.7316	OsFBK4 - F-box domain and kelch repeat containing protein, expressed	induced in osnf-yb7, repressed in OsGLK1-OX
LOC_Os02g14600	0.454967	32.257	glutelin, putative, expressed	induced in osnf-yb7, repressed in OsGLK1-OX
LOC_Os02g15150	0.447156	12.0607	glutelin, putative, expressed	induced in osnf-yb7, repressed in OsGLK1-OX
LOC_Os02g15169	0.438561	14.9381	glutelin, putative, expressed	induced in osnf-yb7, repressed in OsGLK1-OX
LOC_Os02g16820	0.432626	14.1566	glutelin, putative, expressed	induced in osnf-yb7, repressed in OsGLK1-OX
LOC_Os02g16830	0.413506	17.5137	glutelin, putative, expressed	induced in osnf-yb7, repressed in OsGLK1-OX
LOC_Os02g18650	0.335686	3.52704	pectinesterase, putative, expressed	induced in osnf-yb7, repressed in OsGLK1-OX
LOC_Os02g33060	0.48581	6.36697	expressed protein	induced in osnf-yb7, repressed in OsGLK1-OX
LOC_Os02g49720	0.238158	4.06554	aldehyde dehydrogenase, putative, expressed	induced in osnf-yb7, repressed in OsGLK1-OX
LOC_Os02g56120	0.385371	3.61348	OsIAA9 - Auxin-responsive Aux/IAA gene family member, expressed	induced in osnf-yb7, repressed in OsGLK1-OX
LOC_Os02g56460	0.288859	8.92291	dehydrogenase, putative, expressed	induced in osnf-yb7, repressed in OsGLK1-OX
LOC_Os03g02380	0.367733	5.23753	major facilitator superfamily domain-containing protein 5, putative, expressed	induced in osnf-yb7, repressed in OsGLK1-OX
LOC_Os03g03334	0.414621	10.2217	expressed protein	induced in osnf-yb7, repressed in OsGLK1-OX
LOC_Os03g03660	0.45856	2.8874	CAMK_CAMK_like.17 - CAMK includes calcium/calmodulin depedent protein kinases, expressed	induced in osnf-yb7, repressed in OsGLK1-OX
LOC_Os03g04020	0.463239	4.6381	expansin precursor, putative, expressed	induced in osnf-yb7, repressed in OsGLK1-OX
LOC_Os03g12510	0.0791797	8.08925	non-symbiotic hemoglobin 2, putative, expressed	induced in osnf-yb7, repressed in OsGLK1-OX
LOC_Os03g12820	0.341592	3.30662	ATP8, putative, expressed	induced in osnf-yb7, repressed in OsGLK1-OX
LOC_Os03g16260	0.417782	8.67561	protein kinase, putative, expressed	induced in osnf-yb7, repressed in OsGLK1-OX
LOC_Os03g19000	0.41917	3.64255	peroxisomal biogenesis factor 11, putative, expressed	induced in osnf-yb7, repressed in OsGLK1-OX
LOC_Os03g19250	0.411036	5.15687	AMP-binding enzyme, putative, expressed	induced in osnf-yb7, repressed in OsGLK1-OX
LOC_Os03g21250	0.450104	2.45816	glycosyl transferase, family 8, putative, expressed	induced in osnf-yb7, repressed in OsGLK1-OX
LOC_Os03g29540	0.464589	3.28627	ATP-dependent protease, putative, expressed	induced in osnf-yb7, repressed in OsGLK1-OX
LOC_Os03g31360	0.444655	11.1942	glutelin, putative, expressed	induced in osnf-yb7, repressed in OsGLK1-OX
LOC_Os03g55240	0.327005	2.05845	cytochrome P450, putative, expressed	induced in osnf-yb7, repressed in OsGLK1-OX
LOC_Os03g55680	0.452312	5.26958	expressed protein	induced in osnf-yb7, repressed in OsGLK1-OX
LOC_Os03g55980	0.490713	3.45862	expressed protein	induced in osnf-yb7, repressed in OsGLK1-OX
LOC_Os03g57490	0.485238	3.6247	fasciclin domain containing protein, expressed	induced in osnf-yb7, repressed in OsGLK1-OX
LOC_Os03g58880	0.436681	3.70343	oxidoreductase, putative, expressed	induced in osnf-yb7, repressed in OsGLK1-OX
LOC_Os03g63330	0.377861	7.45889	aspartokinase, chloroplast precursor, putative, expressed	induced in osnf-yb7, repressed in OsGLK1-OX
LOC_Os04g14680	0.438633	2.86815	OsAPx3 - Peroxisomal Ascorbate Peroxidase encoding gene 5,8, expressed	induced in osnf-yb7, repressed in OsGLK1-OX
LOC_Os05g26350	0.110797	14.5738	PROLM4 - Prolamin precursor, expressed	induced in osnf-yb7, repressed in OsGLK1-OX
LOC_Os05g26368	0.167938	21.5946	prolamin precursor, putative, expressed	induced in osnf-yb7, repressed in OsGLK1-OX
LOC_Os05g26386	0.109369	14.6724	prolamin precursor, putative, expressed	induced in osnf-yb7, repressed in OsGLK1-OX
LOC_Os05g26460	0.137994	15.6207	PROLM11 - Prolamin precursor, expressed	induced in osnf-yb7, repressed in OsGLK1-OX
LOC_Os05g26720	0.114315	10.0055	PROLM16 - Prolamin precursor, expressed	induced in osnf-yb7, repressed in OsGLK1-OX
LOC_Os05g26750	0.199258	15.439	PROLM17 - Prolamin precursor, expressed	induced in osnf-yb7, repressed in OsGLK1-OX
LOC_Os05g26770	0.300391	9.89602	PROLM18 - Prolamin precursor, expressed	induced in osnf-yb7, repressed in OsGLK1-OX
LOC_Os05g28740	0.268041	24.5184	universal stress protein domain containing protein, putative, expressed	induced in osnf-yb7, repressed in OsGLK1-OX
LOC_Os05g33960	0.452763	5.76806	peptide transporter PTR2, putative, expressed	induced in osnf-yb7, repressed in OsGLK1-OX
LOC_Os05g37950	0.368855	6.56308	guanylyl cyclase, putative, expressed	induced in osnf-yb7, repressed in OsGLK1-OX
LOC_Os05g39310	0.308539	32.0001	thiamine pyrophosphate enzyme, C-terminal TPP binding domain containing protein, expressed	induced in osnf-yb7, repressed in OsGLK1-OX
LOC_Os05g39320	0.288737	20.2499	thiamine pyrophosphate enzyme, C-terminal TPP binding domain containing protein, expressed	induced in osnf-yb7, repressed in OsGLK1-OX
LOC_Os05g41970	0.478502	7.98177	SSA1 - 2S albumin seed storage family protein precursor, expressed	induced in osnf-yb7, repressed in OsGLK1-OX
LOC_Os05g48930	0.242918	6.04585	OsGrx_S2 - glutaredoxin subgroup III, expressed	induced in osnf-yb7, repressed in OsGLK1-OX
LOC_Os06g06520	0.3002	4.36772	GDSL-like lipase/acylhydrolase, putative, expressed	induced in osnf-yb7, repressed in OsGLK1-OX
LOC_Os06g10650	0.355766	5.57986	tyrosine phosphatase family protein, putative, expressed	induced in osnf-yb7, repressed in OsGLK1-OX
LOC_Os06g39240	0.394296	7.47981	endothelial differentiation-related factor 1, putative, expressed	induced in osnf-yb7, repressed in OsGLK1-OX
LOC_Os06g40210	0.437116	3.52755	expressed protein	induced in osnf-yb7, repressed in OsGLK1-OX
LOC_Os06g48030	0.368278	5.04777	peroxidase precursor, putative, expressed	induced in osnf-yb7, repressed in OsGLK1-OX
LOC_Os07g09630	0.435294	7.49522	oxidoreductase, putative, expressed	induced in osnf-yb7, repressed in OsGLK1-OX
LOC_Os07g10570	0.418008	8.02244	PROLM25 - Prolamin precursor, expressed	induced in osnf-yb7, repressed in OsGLK1-OX
LOC_Os07g10580	0.437996	7.72634	PROLM26 - Prolamin precursor, expressed	induced in osnf-yb7, repressed in OsGLK1-OX
LOC_Os07g11510	0.474339	6.74732	RAL6 - Seed allergenic protein RA5/RA14/RA17 precursor, expressed	induced in osnf-yb7, repressed in OsGLK1-OX
LOC_Os07g11910	0.450233	16.2778	PROLM20 - Prolamin precursor, expressed	induced in osnf-yb7, repressed in OsGLK1-OX
LOC_Os07g11920	0.34904	12.3856	PROLM22 - Prolamin precursor, expressed	induced in osnf-yb7, repressed in OsGLK1-OX
LOC_Os07g34720	0.482176	5.41703	harpin-induced protein 1 domain containing protein, expressed	induced in osnf-yb7, repressed in OsGLK1-OX
LOC_Os07g47620	0.455894	4.22851	universal stress protein domain containing protein, putative, expressed	induced in osnf-yb7, repressed in OsGLK1-OX
LOC_Os07g48730	0.448124	2.15619	tyrosine protein kinase domain containing protein, putative, expressed	induced in osnf-yb7, repressed in OsGLK1-OX
LOC_Os08g35210	0.488728	2.32291	ferric reductase, putative, expressed	induced in osnf-yb7, repressed in OsGLK1-OX
LOC_Os08g37470	0.301417	3.99442	2-aminoethanethiol dioxygenase, putative, expressed	induced in osnf-yb7, repressed in OsGLK1-OX
LOC_Os09g15480	0.260805	4.07141	Ser/Thr-rich protein T10 in DGCR region, putative, expressed	induced in osnf-yb7, repressed in OsGLK1-OX
LOC_Os09g20460	0.443904	2.53367	VQ domain containing protein, putative, expressed	induced in osnf-yb7, repressed in OsGLK1-OX
LOC_Os09g28180	0.436039	5.29922	D-mannose binding lectin family protein, expressed	induced in osnf-yb7, repressed in OsGLK1-OX
LOC_Os09g28420	0.342459	2.06424	alpha-amylase precursor, putative, expressed	induced in osnf-yb7, repressed in OsGLK1-OX
LOC_Os09g35790	0.497202	2.4117	HSF-type DNA-binding domain containing protein, expressed	induced in osnf-yb7, repressed in OsGLK1-OX
LOC_Os10g26060	0.428941	9.23861	glutelin, putative, expressed	induced in osnf-yb7, repressed in OsGLK1-OX
LOC_Os10g28350	0.309055	13.8998	1,2-dihydroxy-3-keto-5-methylthiopentene dioxygenase protein, putative, expressed	induced in osnf-yb7, repressed in OsGLK1-OX
LOC_Os10g38660	0.436668	9.20442	glutathione S-transferase, putative, expressed	induced in osnf-yb7, repressed in OsGLK1-OX
LOC_Os10g42410	0.486404	4.46315	zinc-binding protein, putative, expressed	induced in osnf-yb7, repressed in OsGLK1-OX
LOC_Os12g36910	0.477687	5.17093	calmodulin binding protein, putative, expressed	induced in osnf-yb7, repressed in OsGLK1-OX
LOC_Os12g40180	0.499085	16.1663	expressed protein	induced in osnf-yb7, repressed in OsGLK1-OX
LOC_Os12g42980	0.411749	19.4654	cysteine synthase, putative, expressed	induced in osnf-yb7, repressed in OsGLK1-OX
LOC_Os01g03680	2.41658	0.167065	BBTI8 - Bowman-Birk type bran trypsin inhibitor precursor, expressed	repressed in osnf-yb7, induced in OsGLK1-OX
LOC_Os01g44970	2.0356	0.226002	polygalacturonase, putative, expressed	repressed in osnf-yb7, induced in OsGLK1-OX
LOC_Os01g52100	2.29181	0.313802	DUF581 domain containing protein, expressed	repressed in osnf-yb7, induced in OsGLK1-OX
LOC_Os01g54430	2.00864	0.43506	plastocyanin-like domain containing protein, putative, expressed	repressed in osnf-yb7, induced in OsGLK1-OX
LOC_Os01g58670	2.0171	0.0971011	expressed protein	repressed in osnf-yb7, induced in OsGLK1-OX
LOC_Os02g26720	2.33957	0.0798441	Inositol 1, 3, 4-trisphosphate 5/6-kinase, putative, expressed	repressed in osnf-yb7, induced in OsGLK1-OX
LOC_Os03g44380	2.68053	0.477287	9-cis-epoxycarotenoid dioxygenase 1, chloroplast precursor, putative, expressed	repressed in osnf-yb7, induced in OsGLK1-OX
LOC_Os03g46570	2.41748	0.380337	protein binding protein, putative, expressed	repressed in osnf-yb7, induced in OsGLK1-OX
LOC_Os03g52860	2.73772	0.197181	lipoxygenase, putative, expressed	repressed in osnf-yb7, induced in OsGLK1-OX
LOC_Os04g18710	7.43584	0.200852	retrotransposon protein, putative, Ty3-gypsy subclass, expressed	repressed in osnf-yb7, induced in OsGLK1-OX
LOC_Os04g33820	2.05164	0.297172	OsFBX132 - F-box domain containing protein, expressed	repressed in osnf-yb7, induced in OsGLK1-OX
LOC_Os05g18446	2.02523	0.089157	retrotransposon protein, putative, Ty3-gypsy subclass, expressed	repressed in osnf-yb7, induced in OsGLK1-OX
LOC_Os06g18010	2.10208	0.210488	UDP-glucoronosyl and UDP-glucosyl transferase domain containing protein, expressed	repressed in osnf-yb7, induced in OsGLK1-OX
LOC_Os06g46350	2.22993	0.462422	PLA IIIA/PLP7, putative, expressed	repressed in osnf-yb7, induced in OsGLK1-OX
LOC_Os08g41750	4.51408	0.357793	OsFBX303 - F-box domain containing protein, expressed	repressed in osnf-yb7, induced in OsGLK1-OX
LOC_Os09g08280	2.67952	0.0049989	expressed protein	repressed in osnf-yb7, induced in OsGLK1-OX
LOC_Os09g16030	2.15333	0.27874	cytokinin-O-glucosyltransferase 1, putative, expressed	repressed in osnf-yb7, induced in OsGLK1-OX
LOC_Os10g11100	3.34556	0.33331	retrotransposon protein, putative, unclassified, expressed	repressed in osnf-yb7, induced in OsGLK1-OX
LOC_Os10g36626	2.22081	0.37703	expressed protein	repressed in osnf-yb7, induced in OsGLK1-OX
LOC_Os11g40530	7.13934	0.462969	LTPL162 - Protease inhibitor/seed storage/LTP family protein precursor, expressed	repressed in osnf-yb7, induced in OsGLK1-OX
LOC_Os12g13445	193.774	0.0221541	expressed protein	repressed in osnf-yb7, induced in OsGLK1-OX
LOC_Os12g32610	3.42878	0.370545	expressed protein	repressed in osnf-yb7, induced in OsGLK1-OX
LOC_Os12g32970	2.02876	0.417531	membrane associated DUF588 domain containing protein, putative, expressed	repressed in osnf-yb7, induced in OsGLK1-OX
