# Supplementary material for: OsNF-YB7 inactivates OsGLK1 to inhibit chlorophyll biosynthesis in rice embryo
Source: eLife. 2024 Sep 17;13:RP96553. doi: 10.7554/eLife.96553 (PMC11407766; doi:10.7554/eLife.96553)
Supplement: Figure 5—source data 1. [file elife-96553-fig5-data1.xlsx]

## Sheet: Sheet1
Supplementary Table 3. Common targets of OsGLK1 and OsNF-YB7.
Locus ID	Chr	OsGLK1_rep1					OsGLK1_rep2					OsNF-YB7					MSU annotation
		Position of the peak center	Peak length	Peak shape score	p value	Distance from the peak center to the start codon*	Position of the peak center	Peak length	Peak shape score	p value	Distance from the peak center to the start codon*	Position of the peak center	Peak length	Peak shape score	p value	Distance from the peak center to the start codon*
LOC_Os01g08880	1	4458000	260	1.33723	0.0905738	796	4457963	245	1.59054	0.0558567	753	4457955	483	7.20112	2.986e-13	623	expressed protein
LOC_Os01g18320	1	10291837	256	2.1893	0.0142876	0	10291891	252	1.88747	0.0295486	0	10291907	476	3.25999	0.0005571	0	protoporphyrinogen oxidase, chloroplast precursor, putative, expressed
LOC_Os01g31690	1	17349200	242	2.51421	0.005965	0	17349186	244	2.49935	0.006221	3	17349212	470	7.92413	1.149e-15	0	oxygen-evolving enhancer protein 1, chloroplast precursor, putative, expressed
LOC_Os01g34050	1	18749123	301	2.90784	0.00182	0	18749124	345	2.86975	0.002054	0	18749171	485	6.06287	6.686e-10	0	expressed protein
LOC_Os01g39960	1	22534922	269	3.13377	0.0008629	0	22534893	304	2.88966	0.001928	0	22534900	490	14.9447	8.438e-51	0	lycopene epsilon cyclase, chloroplast precursor, putative, expressed
LOC_Os01g40310	1	22755443	263	1.46713	0.0711707	0	22755408	237	1.54609	0.0610419	0	22755936	484	5.22424	8.744e-08	216	expressed protein
LOC_Os01g40320	1	22755443	263	1.46713	0.0711707	493	22755408	237	1.54609	0.0610419	552	22755936	484	5.22424	8.744e-08	0	DNA damage-binding protein 1, putative, expressed
LOC_Os01g41710	1	23607254	284	2.11858	0.0170629	0	23607255	241	2.03393	0.0209793	0	23607282	502	6.61799	1.821e-11	0	chlorophyll A-B binding protein, putative, expressed
LOC_Os01g51010	1	29306410	262	1.64011	0.0504915	0	29306321	344	1.87248	0.0305701	0	29306413	495	4.52144	3.071e-06	0	DUF292 domain containing protein, expressed
LOC_Os01g51890	1	29829713	361	2.23421	0.0127345	169	29829720	321	2.64989	0.004026	202	29830024	483	14.5495	2.94e-48	0	endonuclease/exonuclease/phosphatase family domain containing protein, expressed
LOC_Os01g56680	1	32709407	278	2.53034	0.005698	0	32709407	244	3.0771	0.001045	0	32709397	493	9.69341	1.608e-22	0	photosystem II reaction center W protein, chloroplast precursor, putative, expressed
LOC_Os01g62050	1	35909994	255	1.34932	0.0886169	753	35909953	283	1.66156	0.0483007	726	35909991	485	4.06905	2.36e-05	649	expressed protein
LOC_Os01g62060	1	35911998	288	3.18717	0.0007184	0	35912006	273	3.22067	0.0006395	0	35911956	489	5.51033	1.791e-08	0	plant-specific domain TIGR01589 family protein, expressed
LOC_Os01g67120	1	38966251	298	4.43954	4.508e-06	0	38966249	314	4.09388	2.121e-05	0	38966251	486	4.52243	3.057e-06	0	rhodanese-like domain containing protein, putative, expressed
LOC_Os02g02740	2	1040624	272	2.08826	0.0183872	793	1040630	276	1.89313	0.0291705	764	1039878	472	6.60423	1.998e-11	0	PPR repeat containing protein, expressed
LOC_Os02g02750	2	1040624	272	2.08826	0.0183872	0	1040630	276	1.89313	0.0291705	0	1039878	472	6.60423	1.998e-11	414	CDP-alcohol phosphatidyltransferase, putative, expressed
LOC_Os02g03280	2	1326815	318	1.35042	0.0884403	0	1326791	262	1.57905	0.0571626	0	1326815	516	6.06591	6.56e-10	0	transmembrane BAX inhibitor motif-containing protein, putative, expressed
LOC_Os02g05400	2	2598165	248	1.34665	0.0890471	0	2598167	287	1.68495	0.0459991	0	2598406	488	6.25029	2.048e-10	0	transmembrane protein 15, putative, expressed
LOC_Os02g10390	2	5470630	323	2.41786	0.007806	0	5470630	362	2.77309	0.002776	0	5470576	512	5.17733	1.125e-07	0	chlorophyll A-B binding protein, putative, expressed
LOC_Os02g22100	2	13156449	250	1.46573	0.0713613	0	13156406	285	1.94394	0.0259512	7	13156457	521	4.3445	6.98e-06	0	OsRhmbd6 - Putative Rhomboid homologue, expressed
LOC_Os02g32469	2	19205174	253	1.40134	0.0805556	848	19205189	252	1.36345	0.0863708	851	19204459	479	11.0418	1.201e-28	17	expressed protein
LOC_Os02g32590	2	19313031	248	1.53504	0.0623872	0	19313071	325	1.56763	0.058484	0	19313063	486	12.008	1.613e-33	0	HSF-type DNA-binding domain containing protein, expressed
LOC_Os02g33580	2	19973076	362	1.48831	0.0683345	0	19973063	330	1.67311	0.0471524	0	19973063	510	5.87113	2.164e-09	0	digalactosyldiacylglycerol synthase, chloroplast precursor, putative, expressed
LOC_Os02g35180	2	21131430	290	1.64444	0.0500428	0	21131413	303	2.18855	0.014315	0	21131374	528	2.24307	0.0124461	0	OsRR2 type-A response regulator, expressed
LOC_Os02g37060	2	22390215	249	1.55755	0.0596699	32	22390217	250	1.94715	0.0257582	15	22390249	471	8.98645	1.277e-19	0	photosystem II 5 kDa protein, chloroplast precursor, putative, expressed
LOC_Os02g39710	2	23989000	274	1.35058	0.0884144	595	23988963	214	1.55522	0.059947	667	23989014	482	14.7789	1.001e-49	490	CCT/B-box zinc finger protein, putative, expressed
LOC_Os02g41850	2	25160485	243	2.20503	0.013726	0	25160495	247	2.27398	0.0114835	0	25160769	497	6.08377	5.869e-10	0	expressed protein
LOC_Os02g42310	2	25445873	251	1.87177	0.0306193	0	25445925	321	1.42565	0.0769846	0	25445776	491	3.20983	0.0006641	0	OsSCP8 - Putative Serine Carboxypeptidase homologue, expressed
LOC_Os02g46980	2	28684085	242	2.75537	0.002931	112	28683990	254	2.56908	0.005099	49	28684080	474	10.4632	6.373e-26	0	pentatricopeptide, putative, expressed
LOC_Os02g49870	2	30471910	269	1.58568	0.0564058	0	30471906	238	1.82539	0.0339713	0	30471961	483	7.626	1.211e-14	0	expressed protein
LOC_Os02g49880	2	30476077	302	5.64369	8.322e-09	123	30476041	249	5.1437	1.347e-07	147	30476042	470	7.62117	1.257e-14	34	CCT/B-box zinc finger protein, putative, expressed
LOC_Os02g53860	2	32987947	332	1.75521	0.0396116	0	32987953	332	1.98626	0.0235022	0	32987867	481	5.49352	1.97e-08	0	OsSub22 - Putative Subtilisin homologue, expressed
LOC_Os02g54580	2	33429857	248	2.00135	0.0226774	0	33429859	255	2.43591	0.007427	0	33429969	471	9.85843	3.151e-23	0	serine esterase family protein, putative, expressed
LOC_Os02g57280	2	35091725	287	3.42975	0.0003021	497	35091602	363	3.60373	0.0001568	497	35091693	493	4.6082	2.031e-06	390	CBS domain containing membrane protein, putative, expressed
LOC_Os02g57290	2	35091725	287	3.42975	0.0003021	0	35091602	363	3.60373	0.0001568	0	35091693	493	4.6082	2.031e-06	0	cytochrome P450, putative, expressed
LOC_Os02g57330	2	35123073	341	1.37287	0.084897	217	35123006	311	2.0366	0.0208449	140	35122784	523	1.86153	0.0313346	0	expressed protein
LOC_Os02g57340	2	35123073	341	1.37287	0.084897	0	35123006	311	2.0366	0.0208449	0	35122784	523	1.86153	0.0313346	0	tetratricopeptide-like helical, putative, expressed
LOC_Os03g01014	3	13011	287	5.4263	2.877e-08	17	12981	310	6.42105	6.767e-11	24	13029	480	11.4626	1.016e-30	0	expressed protein
LOC_Os03g03440	3	1484209	242	2.30915	0.0104677	0	1484190	258	2.39413	0.00833	0	1484221	705	2.58913	0.004811	0	expressed protein
LOC_Os03g06630	3	3342061	280	1.92285	0.0272492	73	3342047	315	2.27458	0.0114654	87	3342011	604	2.78843	0.002648	0	heat stress transcription factor, putative, expressed
LOC_Os03g12130	3	6370010	244	1.75827	0.0393505	959	6370011	274	1.78779	0.0369051	930	6369133	699	13.4575	1.39e-41	0	expressed protein
LOC_Os03g12140	3	6370010	244	1.75827	0.0393505	0	6370011	274	1.78779	0.0369051	0	6369133	699	13.4575	1.39e-41	78	glucan endo-1,3-beta-glucosidase precursor, putative, expressed
LOC_Os03g15740	3	8678968	294	1.43792	0.0752277	22	8678952	285	1.31611	0.0940693	38	8678964	485	10.4084	1.135e-25	0	uncharacterized TPR repeat-containing protein, putative, expressed
LOC_Os03g17200	3	9575130	263	1.87498	0.0303975	294	9575064	273	2.23216	0.012802	326	9575047	511	14.9935	4.047e-51	220	plant-specific domain TIGR01589 family protein, expressed
LOC_Os03g17310	3	9642612	328	1.5994	0.0548654	432	9642633	354	1.59256	0.0556297	424	9642651	580	14.9117	1.383e-50	323	calcium-transporting ATPase, endoplasmic reticulum-type, putative, expressed
LOC_Os03g19380	3	10910531	282	1.97451	0.0241617	0	10910541	272	2.61126	0.004511	0	10909880	505	2.31795	0.0102261	391	calvin cycle protein CP12, putative, expressed
LOC_Os03g20700	3	11712146	251	4.17761	1.473e-05	0	11712151	339	4.1139	1.945e-05	0	11712035	480	8.25137	7.829e-17	0	magnesium-chelatase, putative, expressed
LOC_Os03g20730	3	11731585	291	1.41193	0.0789857	35	11731584	234	1.64919	0.0495542	48	11731673	498	2.73318	0.003136	0	chaperone protein dnaJ, putative, expressed
LOC_Os03g21560	3	12320906	265	2.91535	0.001776	0	12320862	257	3.21127	0.0006608	0	12320891	486	5.99004	1.049e-09	0	photosystem II 11 kD protein, putative, expressed
LOC_Os03g21710	3	12394234	244	1.28374	0.0996168	313	12394218	242	1.31001	0.0950955	322	12394260	674	2.806	0.002508	0	WRKY79, expressed
LOC_Os03g24590	3	14006114	258	3.31901	0.0004517	0	14006107	263	3.31281	0.0004618	0	14006055	487	6.99255	1.35e-12	0	mTERF domain containing protein, expressed
LOC_Os03g24950	3	14233072	279	1.86343	0.0312012	0	14233073	255	1.81564	0.0347127	0	14233090	470	4.82223	7.098e-07	0	expressed protein
LOC_Os03g29970	3	17085165	276	2.14881	0.0158247	69	17085116	246	2.16286	0.0152758	148	17085106	470	10.132	1.993e-24	48	histone-like transcription factor and archaeal histone, putative, expressed
LOC_Os03g36540	3	20249980	271	2.42496	0.007655	0	20250087	322	1.86666	0.0309745	0	20249989	476	3.62304	0.0001456	0	magnesium-chelatase subunit chlI, chloroplast precursor, putative, expressed
LOC_Os03g39610	3	21999934	250	3.16671	0.0007709	0	21999921	267	3.28102	0.0005172	0	21999928	499	8.52887	7.389e-18	0	chlorophyll A-B binding protein, putative, expressed
LOC_Os03g47050	3	26618260	266	1.64314	0.0501766	0	26618246	253	1.54718	0.0609105	0	26618938	546	4.02696	2.825e-05	369	expressed protein
LOC_Os03g50310	3	28686800	325	5.57386	1.246e-08	38	28686770	318	5.74989	4.465e-09	69	28686814	475	14.2055	4.236e-46	0	CCT/B-box zinc finger protein, putative, expressed
LOC_Os03g52660	3	30197130	261	2.07315	0.0190792	10	30197136	319	2.08251	0.0186479	4	30197081	523	6.2675	1.834e-10	0	ATP synthase F1, delta subunit family protein, putative, expressed
LOC_Os03g56160	3	32008267	254	2.11083	0.0173935	1	32008281	272	1.77157	0.0382331	0	32008277	492	6.15034	3.866e-10	0	lectin-like receptor kinase 7, putative, expressed
LOC_Os03g56670	3	32274293	322	1.3608	0.0867883	0	32274313	309	1.45266	0.0731586	0	32274221	481	3.44616	0.0002843	0	photosystem I reaction center subunit III, chloroplast precursor, putative, expressed
LOC_Os03g57149	3	32591467	272	4.06217	2.431e-05	0	32591451	265	3.58659	0.0001675	0	32591489	488	3.43247	0.0002991	0	mTERF domain containing protein, expressed
LOC_Os03g57240	3	32647888	259	1.30744	0.0955312	699	32647888	252	1.71006	0.0436277	706	32647886	470	11.338	4.252e-30	600	ZOS3-19 - C2H2 zinc finger protein, expressed
LOC_Os03g57500	3	32787486	250	1.96	0.0249977	45	32787465	261	2.3005	0.0107099	25	32787378	479	6.45396	5.448e-11	0	zinc finger, C3HC4 type domain containing protein, expressed
LOC_Os04g24140	4	13802149	258	1.50803	0.0657737	0	13802161	285	1.4778	0.0697313	0	13802225	482	4.23011	1.168e-05	0	ribose-5-phosphate isomerase A, putative, expressed
LOC_Os04g33110	4	20047717	243	2.02393	0.0214885	676	20047733	269	2.35488	0.009264	666	20047221	705	9.82361	4.455e-23	67	expressed protein
LOC_Os04g33115	4	20047717	243	2.02393	0.0214885	0	20047733	269	2.35488	0.009264	0	20047221	705	9.82361	4.455e-23	0	expressed protein
LOC_Os04g33830	4	20496017	307	2.68068	0.003674	0	20495961	244	3.3774	0.0003659	0	20495961	485	7.88657	1.553e-15	0	membrane protein, putative, expressed
LOC_Os04g35700	4	21758474	279	1.45792	0.0724317	0	21758377	271	1.82619	0.0339112	0	21758859	481	10.0955	2.891e-24	0	STE_MEKK_ste11_MAP3K.16 - STE kinases include homologs to sterile 7, sterile 11 and sterile 20 from yeast, expressed
LOC_Os04g37619	4	22369563	272	1.34147	0.0898838	0	22369546	337	1.31094	0.0949385	0	22369579	501	9.31086	6.34e-21	0	zeaxanthin epoxidase, chloroplast precursor, putative, expressed
LOC_Os04g37920	4	22549979	295	1.92571	0.0270702	0	22549909	253	1.48863	0.0682922	0	22550592	704	2.02693	0.0213346	0	FAD binding domain of DNA photolyase domain containing protein, expressed
LOC_Os04g38410	4	22837335	326	3.56245	0.0001837	0	22837261	249	3.83926	6.17e-05	0	22837276	499	6.75742	7.023e-12	0	chlorophyll A-B binding protein, putative, expressed
LOC_Os04g38920	4	23127863	262	1.55921	0.0594736	557	23127936	276	1.31561	0.094153	471	23127840	494	7.70361	6.614e-15	463	DUF593 domain containing protein, expressed
LOC_Os04g42020	4	24889657	268	2.71388	0.003325	206	24889663	249	2.98786	0.001405	193	24889660	495	8.48009	1.125e-17	64	CCT/B-box zinc finger protein, putative, expressed
LOC_Os04g48880	4	29158207	362	2.50181	0.006178	0	29158233	314	2.80121	0.002546	0	29158344	481	11.0706	8.707e-29	0	fatty acid hydroxylase, putative, expressed
LOC_Os04g58200	4	34662865	266	2.19681	0.014017	43	34662888	357	2.34647	0.009476	0	34662796	505	9.9602	1.138e-23	25	protochlorophyllide reductase A, chloroplast precursor, putative, expressed
LOC_Os05g03740	5	1643451	264	1.38725	0.0826835	0	1643398	272	1.55723	0.0597079	0	1643566	475	2.46023	0.006942	0	transcription factor TF2, putative, expressed
LOC_Os05g06440	5	3303141	258	1.32137	0.0931886	0	3303069	333	1.52206	0.0639971	0	3303112	489	8.4825	1.102e-17	0	dnaJ homolog subfamily B member 11 precursor, putative, expressed
LOC_Os05g33280	5	19509014	240	2.57595	0.004998	0	19509004	242	2.81932	0.002406	0	19509039	588	2.08272	0.0186382	0	thylakoid lumen protein, putative, expressed
LOC_Os05g35470	5	21080040	261	2.27217	0.0115381	39	21080047	253	1.90833	0.0281742	35	21080080	490	3.22578	0.0006281	0	dienelactone hydrolase family protein, expressed
LOC_Os05g38210	5	22406527	321	1.35796	0.0872381	179	22406520	256	1.30801	0.0954347	158	22406353	482	5.75093	4.438e-09	0	mitochondrial glycoprotein, putative, expressed
LOC_Os05g38219	5	22406527	321	1.35796	0.0872381	0	22406520	256	1.30801	0.0954347	0	22406353	482	5.75093	4.438e-09	0	expressed protein
LOC_Os05g38680	5	22679383	276	2.88012	0.001988	0	22679397	294	2.77769	0.002737	0	22679375	476	6.28219	1.669e-10	0	plant-specific domain TIGR01589 family protein, expressed
LOC_Os05g48620	5	27878590	241	3.06821	0.001077	931	27878591	263	3.3008	0.0004821	911	27878560	473	11.0498	1.098e-28	787	tRNA-binding arm, putative, expressed
LOC_Os05g48630	5	27878590	241	3.06821	0.001077	0	27878591	263	3.3008	0.0004821	0	27878560	473	11.0498	1.098e-28	0	expressed protein
LOC_Os05g51930	5	29806331	262	1.66524	0.0479323	0	29806318	255	1.89311	0.0291719	0	29804885	393	3.25817	0.0005607	0	retrotransposon protein, putative, Ty3-gypsy subclass, expressed
LOC_Os05g52070	5	29907845	242	4.39978	5.418e-06	0	29907851	256	4.7806	8.739e-07	0	29907845	383	2.69077	0.003564	0	retrotransposon protein, putative, Ty3-gypsy subclass, expressed
LOC_Os06g01210	6	150314	259	2.34381	0.009544	0	150303	273	2.25566	0.0120459	0	150337	631	6.6108	1.911e-11	0	plastocyanin, chloroplast precursor, putative, expressed
LOC_Os06g05880	6	2690299	244	1.68149	0.0463343	0	2690309	246	2.13203	0.0165023	0	2690269	473	2.29372	0.0109033	0	profilin domain containing protein, expressed
LOC_Os06g12370	6	6704846	326	3.68527	0.0001142	309	6704846	321	4.00419	3.111e-05	309	6704979	485	4.8247	7.011e-07	313	OsFtsH6 FtsH protease, homologue of AtFtsH6, expressed
LOC_Os06g15330	6	8704593	259	4.4451	4.393e-06	118	8704565	297	4.08738	2.181e-05	148	8704599	509	6.88079	2.976e-12	0	CCT/B-box zinc finger protein, putative, expressed
LOC_Os06g15400	6	8752796	286	3.75697	8.599e-05	3	8752816	337	3.54684	0.0001949	0	8752682	479	6.55253	2.828e-11	0	expressed protein
LOC_Os06g21590	6	12452644	285	3.61026	0.0001529	0	12452579	323	4.11846	1.907e-05	0	12452568	482	4.06361	2.416e-05	0	chlorophyll A-B binding protein, putative, expressed
LOC_Os06g39260	6	23303546	274	1.35143	0.0882786	0	23303579	268	1.34833	0.0887754	0	23303568	479	8.65567	2.45e-18	0	solute carrier family 35 member B1, putative, expressed
LOC_Os06g42850	6	25750002	263	1.42046	0.0777373	0	25749987	253	1.28518	0.0993649	0	25749995	485	9.39476	2.868e-21	0	extracellular ligand-gated ion channel, putative, expressed
LOC_Os06g43870	6	26426316	280	1.31986	0.0934416	0	26426302	242	2.44565	0.007229	0	26426349	495	15.0251	2.516e-51	0	expressed protein
LOC_Os06g45570	6	27594055	280	2.34908	0.00941	412	27594047	283	2.4951	0.006296	460	27594178	600	6.0693	6.423e-10	83	VQ domain containing protein, putative, expressed
LOC_Os07g04840	7	2138416	268	3.11864	0.0009084	37	2138381	251	3.21303	0.0006567	22	2138424	544	5.26851	6.877e-08	0	PsbP, putative, expressed
LOC_Os07g05480	7	2546369	264	2.62872	0.004285	0	2546383	243	2.85555	0.002148	0	2546354	573	1.31875	0.093627	0	photosystem I reaction center subunit, chloroplast precursor, putative, expressed
LOC_Os07g08760	7	4508025	247	2.45122	0.007119	120	4507995	245	2.71853	0.003279	85	4507937	501	9.94067	1.385e-23	0	START domain containing protein, putative, expressed
LOC_Os07g25430	7	14533223	251	3.85454	5.797e-05	0	14533222	250	3.92525	4.332e-05	0	14533191	504	5.82883	2.791e-09	0	photosystem I reaction center subunit IV A, chloroplast precursor, putative, expressed
LOC_Os07g28610	7	16743554	245	3.39403	0.0003444	0	16743563	247	3.4619	0.0002682	0	16743492	534	3.00245	0.001339	0	expressed protein
LOC_Os07g35870	7	21467182	288	3.44339	0.0002872	0	21467140	361	2.69956	0.003472	0	21469844	511	2.02643	0.0213604	0	basic helix-loop-helix DND-binding domain containing protein, expressed
LOC_Os07g36080	7	21574278	317	3.3515	0.0004019	0	21574283	292	4.01233	3.006e-05	0	21574305	483	12.5613	1.722e-36	0	oxygen evolving enhancer protein 3 domain containing protein, expressed
LOC_Os07g37240	7	22318091	289	1.58977	0.055943	34	22318124	252	1.96734	0.0245722	57	22318045	495	6.9558	1.753e-12	0	chlorophyll A-B binding protein, putative, expressed
LOC_Os07g37550	7	22487319	359	4.75552	9.897e-07	0	22487317	361	4.88721	5.114e-07	0	22487353	513	7.75239	4.509e-15	0	chlorophyll A-B binding protein, putative, expressed
LOC_Os07g38960	7	23357659	264	4.22441	1.198e-05	0	23357633	357	4.24482	1.094e-05	0	23357653	480	9.88578	2.399e-23	0	chlorophyll A-B binding protein, putative, expressed
LOC_Os07g41694	7	24984523	293	1.35265	0.0880839	0	24984477	252	1.46181	0.0718966	11	24984405	585	11.2447	1.229e-29	0	acidic leucine-rich nuclear phosphoprotein 32-related protein 1, putative, expressed
LOC_Os08g02630	8	1090774	262	1.42399	0.077224	0	1090720	245	1.73069	0.041754	0	1090763	509	5.18039	1.107e-07	0	photosystem II core complex proteins psbY, chloroplast precursor, putative, expressed
LOC_Os08g06630	8	3732492	255	1.3698	0.0853745	0	3732518	263	1.28373	0.0996186	0	3732447	487	4.06742	2.377e-05	0	RNA polymerase sigma factor, putative, expressed
LOC_Os08g10020	8	5808460	261	2.16901	0.0150408	0	5808448	294	2.57231	0.005051	0	5808443	495	8.4151	1.963e-17	0	photosystem II 10 kDa polypeptide, chloroplast precursor, putative, expressed
LOC_Os08g14450	8	8678001	304	1.54455	0.0612278	0	8677990	317	1.65411	0.0490522	0	8677944	505	2.65655	0.003947	0	RNA polymerase sigma factor, putative, expressed
LOC_Os08g17680	8	10813604	247	1.44656	0.0740099	141	10813591	270	2.49053	0.006378	109	10813553	490	11.5552	3.475e-31	0	stromal cell-derived factor 2-like protein precursor, putative, expressed
LOC_Os08g19640	8	11755101	251	1.83911	0.0329494	0	11755106	337	2.17345	0.0148734	0	11755029	489	21.522	4.843e-103	0	hypothetical protein
LOC_Os08g29020	8	17770369	361	2.16116	0.0153416	0	17770268	265	2.54417	0.005477	0	17770400	481	6.48036	4.575e-11	0	wall-associated kinase-like 2, putative, expressed
LOC_Os08g33820	8	21172862	241	4.54265	2.778e-06	64	21172839	245	4.74956	1.019e-06	35	21172790	476	8.98643	1.277e-19	0	chlorophyll A-B binding protein, putative, expressed
LOC_Os08g33890	8	21208858	256	1.76797	0.0385331	169	21208921	276	1.73186	0.0416489	196	21208771	530	1.99467	0.0230397	0	expressed protein
LOC_Os08g33900	8	21208858	256	1.76797	0.0385331	0	21208921	276	1.73186	0.0416489	0	21208771	530	1.99467	0.0230397	0	CAAX amino terminal protease family protein, putative, expressed
LOC_Os08g44680	8	28084252	257	2.58886	0.004815	0	28084351	344	2.2721	0.0115401	0	28084389	564	2.63292	0.004233	0	photosystem I reaction center subunit II, chloroplast precursor, putative, expressed
LOC_Os08g44690	8	28084252	257	2.58886	0.004815	910	28084351	344	2.2721	0.0115401	827	28084389	564	2.63292	0.004233	674	transposon protein, putative, Pong sub-class, expressed
LOC_Os09g00999	9	3111	295	1.99984	0.0227589	0	3149	289	1.84258	0.0326951	0	3097	471	4.95733	3.573e-07	0	expressed protein
LOC_Os09g01000	9	6299	360	2.28782	0.0110741	0	6185	273	1.82982	0.0336385	48	5818	705	2.10634	0.0175874	97	expressed protein
LOC_Os09g10750	9	5866438	260	4.52131	3.073e-06	0	5866445	244	4.38082	5.912e-06	0	5866438	675	3.35935	0.0003906	0	rhodanese-like, putative, expressed
LOC_Os09g13920	9	8193654	240	1.82459	0.0340314	528	8193667	274	2.37768	0.008711	515	8193774	655	13.2553	2.103e-40	107	expressed protein
LOC_Os09g17740	9	10845669	253	3.92282	4.376e-05	0	10845664	256	3.48781	0.0002435	0	10845644	498	6.28972	1.59e-10	0	chlorophyll A-B binding protein, putative, expressed
LOC_Os09g30340	9	18469684	258	3.32236	0.0004463	0	18469688	250	2.8719	0.00204	0	18469707	518	2.24095	0.0125148	0	photosystem I reaction center subunit, chloroplast precursor, putative, expressed
LOC_Os09g33500	9	19751738	246	1.99647	0.0229415	848	19751746	245	2.02414	0.021478	842	19751757	472	4.45883	4.12e-06	720	transketolase, putative, expressed
LOC_Os10g09240	10	4995365	287	1.69833	0.0447229	39	4995358	255	2.52176	0.005839	62	4995364	522	3.38223	0.0003595	0	expressed protein
LOC_Os10g35370	10	18900314	168	3.08256	0.001026	0	18900316	235	3.0736	0.001057	0	18900198	470	10.1471	1.707e-24	0	oxidoreductase, short chain dehydrogenase/reductase family domain containing family, expressed
LOC_Os10g35840	10	19163308	263	1.77016	0.0383503	684	19163292	272	1.69326	0.0452027	667	19163330	488	9.21507	1.555e-20	591	shikimate/quinate 5-dehydrogenase, putative, expressed
LOC_Os10g38940	10	20745566	355	3.758	8.564e-05	0	20745562	348	4.15735	1.61e-05	0	20745700	489	4.51411	3.179e-06	0	fatty acid hydroxylase, putative, expressed
LOC_Os10g41780	10	22486580	248	1.52926	0.0631004	0	22486591	259	1.53426	0.0624833	0	22486695	630	12.61	9.3e-37	0	chlorophyllide a oxygenase, chloroplast precursor, putative, expressed
LOC_Os11g02610	11	826408	245	3.76757	8.242e-05	456	826436	276	3.73333	9.448e-05	450	826948	496	5.82168	2.913e-09	882	BTBN20 - Bric-a-Brac, Tramtrack, Broad Complex BTB domain with non-phototropic hypocotyl 3 NPH3 and coiled-coil domains, expressed
LOC_Os11g03760	11	1477458	303	1.57747	0.0573433	0	1477431	282	1.80773	0.0353239	0	1477629	488	6.36822	9.562e-11	0	expressed protein
LOC_Os11g13890	11	7659645	248	2.78713	0.002659	0	7659599	322	3.27387	0.0005304	0	7659634	518	5.96317	1.237e-09	0	chlorophyll A-B binding protein, putative, expressed
LOC_Os11g16550	11	9177263	270	2.7149	0.003315	0	9177270	254	3.2513	0.0005744	0	9177269	471	3.17011	0.0007619	0	uncharacterized protein ycf53, putative, expressed
LOC_Os11g45710	11	27655363	234	1.96615	0.0246408	24	27655378	282	2.07998	0.0187637	0	27655327	478	6.31902	1.316e-10	0	Os11bglu36 SFR2 homologue, expressed
LOC_Os12g01574	12	350963	246	1.68724	0.0457784	200	350921	270	1.43817	0.0751925	155	350666	523	3.79073	7.51e-05	0	expressed protein
LOC_Os12g01580	12	350963	246	1.68724	0.0457784	0	350921	270	1.43817	0.0751925	0	350666	523	3.79073	7.51e-05	0	MATE efflux protein, putative, expressed
LOC_Os12g02530	12	864206	289	3.64725	0.0001325	515	864187	248	3.93312	4.193e-05	544	864758	478	4.96357	3.461e-07	992	BTBN22 - Bric-a-Brac, Tramtrack, Broad Complex BTB domain with non-phototropic hypocotyl 3 NPH3 and coiled-coil domains, expressed
LOC_Os12g08120	12	4137838	319	2.88809	0.001938	565	4137837	313	3.1709	0.0007598	572	4137943	480	5.12798	1.464e-07	423	expressed protein
LOC_Os12g08770	12	4506632	266	3.87547	5.321e-05	0	4506603	297	4.38723	5.74e-06	0	4506611	483	6.09661	5.417e-10	0	photosystem I reaction center subunit N, chloroplast precursor, putative, expressed
LOC_Os12g23200	12	13115201	347	1.7988	0.0360251	0	13115216	260	2.91676	0.001768	0	13115208	525	9.20971	1.635e-20	0	photosystem I reaction center subunit XI, chloroplast precursor, putative, expressed
LOC_Os12g25120	12	14425048	257	1.96745	0.0245659	34	14425059	254	1.8594	0.0314852	33	14425045	494	7.29961	1.443e-13	0	core histone H2A/H2B/H3/H4, putative, expressed
LOC_Os12g38640	12	23736747	251	1.36886	0.0855216	0	23736844	350	1.41224	0.07894	0	23736856	658	4.3454	6.951e-06	0	expressed protein
LOC_Os12g38650	12	23736747	251	1.36886	0.0855216	455	23736844	350	1.41224	0.07894	362	23736856	658	4.3454	6.951e-06	44	expressed protein
*, if the peak center located within the gene body region, the distance from the peak center to the start codon are indicated as "0".
