# Supplementary material for: OsNF-YB7 inactivates OsGLK1 to inhibit chlorophyll biosynthesis in rice embryo
Source: eLife. 2024 Sep 17;13:RP96553. doi: 10.7554/eLife.96553 (PMC11407766; doi:10.7554/eLife.96553)
Supplement: Supplementary file 1. [file elife-96553-supp1.xlsx]

## Sheet: Sheet1
Supplementary Table 4. Primers used in this study.
Name	Primer sequence	Purpose
His-OsNF-YB7-F	CAGCAAATGGGTCGCGGATCCATGGAGGCCGGCTACCCG	Plasmid constructs
His-OsNF-YB7-R	ACGGAGCTCGAATTCGGATCCCTACTTGTATCCGAACGGATGCT
MBP-OsGLK1-F	GCGGCCGCGATATCGTCGACATGCTTGCCGTGTCGCCGGCGA
MBP-OsGLK1-R	CCTGCAGGGAATTCGGATCCTCATCCACACGCTGGAGGAACG
GST-His-F	CAGCAAATGGGTCGCGGATCCATGTCCCCTATACTAGGTTATTGGAAA
GST-His-R	ACGGAGCTCGAATTCGGATCCTTTTGGAGGATGGTCGCCA
pCAMBIA1300-OsGLK1-F	TGTGTGTGCAGCCCGGGATCCATGCTTGCCGTGTCGCCG
pCAMBIA1300-OsGLK1-R	TCCATGGTACCTGCAGGATCCTCCACACGCTGGAGGAACG
177-OsNF-YB7-F	TGTGTGTGCAGCCCGGGATCCATGGAGGCCGGCTACCCG
177-OsNF-YB7-R	TCCATGGTACCTGCAGGATCCCTTGTATCCGAACGGATGCTG
pUN1301-OsNF-YB7-F	CAGGTCGACTCTAGAGGATCCATGGAGGCCGGCTACCCG
pUN1301-OsNF-YB7-R	GCTCACGGTACCCGGGGATCCCTTGTATCCGAACGGATGCTG
pJIT163-OsGLK1-GFP-F	CCCAAGCTTGTCGACGGATCCATGCTTGCCGTGTCGCCG
pJIT163-OsGLK1-GFP-R	GCCCTTGCTCACCATGGATCCTCCACACGCTGGAGGAACG
OsPORA-EMSA-F	TACGAAAAAATATCCCACCACGTGTCGCTTTCACAGGACAAT	EMSA Probes
OsPORA-EMSA-R	ATTGTCCTGTGAAAGCGACACGTGGTGGGATATTTTTTCGTA
OsLHCB4-EMSA-F	CCCAATCCCAGCCCTCCACGTGTCACCAACCCCATGGC
OsLHCB4-EMSA-R	GCCATGGGGTTGGTGACACGTGGAGGGCTGGGATTGGG
OsGLK1-EMSA-F	TTTTGCAGAAGCGACCAAGCTGCACTTGCGCTCGCGGACAAGGCAACCCA
OsGLK1-EMSA-R	TGGGTTGCCTTGTCCGCGAGCGCAAGTGCAGCTTGGTCGCTTCTGCAAAA
OsNF-YB7-BD-F	TCAGAGGAGGACCTGCATATGATGGAGGCCGGCTACCCG	Y2H
OsNF-YB7-BD-R	TTCGGCCTCCATGGCCATATGCTTGTATCCGAACGGATGCTG
OsNF-YB7-N-BD-F	TCAGAGGAGGACCTGCATATGATGGAGGCCGGCTACCCG
OsNF-YB7-N-BD-R	TTCGGCCTCCATGGCCATATGTTAGACGCCGACGCCGAC
OsNF-YB7-C-BD-F	TCAGAGGAGGACCTGCATATGGGCGCCGCGCGCGGCGAC
OsNF-YB7-C-BD-R	TTCGGCCTCCATGGCCATATGCTACTTGTATCCGAACGGATGCT
OsGLK1-AD-F	GTACCAGATTACGCTCATATGATGCTTGCCGTGTCGCCG
OsGLK1-AD-R	ACTGGCCTCCATGGCCATATGTCATCCACACGCTGGAGGAA
OsGLK1-N-AD-F	GTACCAGATTACGCTCATATGATGCTTGCCGTGTCGCCG
OsGLK1-N-AD-R	ACTGGCCTCCATGGCCATATGCGATGACGGCGACGAAGA
OsGLK1-BD-AD-F	GTACCAGATTACGCTCATATGACGACGTCGTCGTCGCAG
OsGLK1-BD-AD-R	ACTGGCCTCCATGGCCATATGCGGGTGGCCCCAAACATG
OsGLK1-GCT-AD-F	GTACCAGATTACGCTCATATGACGATGGACCCGTCCCGA
OsGLK1-GCT-AD-R	ACTGGCCTCCATGGCCATATGTCATCCACACGCTGGAGGAA
OsGLK2-AD-F	GTACCAGATTACGCTCATATGATGCTTGAGGTGTCCACGCT
OsGLK2-AD-R	ACTGGCCTCCATGGCCATATGTCAGCCGGCGGCACCGCT
pGreenII GAL4-OsGLK1-F	CTCGAGGGGGGGCCCGGTACCATAAAAAAATCATCAACTAAA	DLR
pGreenII GAL4-OsGLK1-R	AACGACGGCCAGTGAGCGCGCCTCGGCCAGGAGCTCGGTGCAG
pGreenII BD-VP16-OsNF-YB7-F	TCCCCCGGGCTGCAGGAATTCATGGAGGCCGGCTACCCG
pGreenII BD-VP16-OsNF-YB7-R	GATAAGCTTGATATCGAATTCCTACTTGTATCCGAACGGATGCT
0800-OsPORA-F	TCCTGCAGCCCGGGGGATCCATCATTTTTGCTTATGCTTATA
0800-OsPORA-R	GCTCTAGAACTAGTGGATCCTGGTGTGAGTGTTTGAGTTTGG
0800-OsLHCB4-F	CCCCCTCGAGGTCGACTTCAATGGCTTCCTTGACAG
0800-OsLHCB4-R	TTGGCGTCTTCCATGGGGCTGCTCCTCTCCTTCTTC
62-SK-OsGLK1-F	GCTCTAGAACTAGTGGATCCATGCTTGCCGTGTCGCCGGCGA
62-SK-OsGLK1-R	ATAAGCTTGATATCGAATTCTCATCCACACGCTGGAGGAACG
62-SK-OsNF-YB7-F	GCTCTAGAACTAGTGGATCCATGGAGGCCGGCTACCCGGGCA
62-SK-OsNF-YB7-R	ATAAGCTTGATATCGAATTCCTACTTGTATCCGAACGGATGC
OsNF-YB7-YNE-F	TGGCGCGCCACTAGTGGATCCATGGAGGCCGGCTACCCG	BiFC
OsNF-YB7-YNE-R	GACAGTACTATCGATGGATCCCTTGTATCCGAACGGATGCTG
OsGLK1-YCE-F	TGGCGCGCCACTAGTGGATCCATGCTTGCCGTGTCGCCG
OsGLK1-YCE-R	GACAGTACTATCGATGGATCCTCCACACGCTGGAGGAACG
pJIT163-OsNF-YB7-GFP-F	CCCAAGCTTGTCGACGGATCCATGGAGGCCGGCTACCCG	Co-IP
pJIT163-OsNF-YB7-GFP-R	GCCCTTGCTCACCATGGATCCCTTGTATCCGAACGGATGCTG
pUC19-OsGLK1-Flag-F	ACGGGGGACGAGCTCGGTACCATGCTTGCCGTGTCGCCG
pUC19-OsGLK1-Flag-R	ACGAAAGCTCTGCAGGTCGACACAGCAGCAGCTCCTTGGC
772-OsNF-YB7-F	TACGCGTCCCGGGGCGGTACCATGGAGGCCGGCTACCCG	Split complementary LUC
772-OsNF-YB7-R	ACGAAAGCTCTGCAGGTCGACCTTGTATCCGAACGGATGCTG
771-OsGLK1-F	ACGGGGGACGAGCTCGGTACCATGCTTGCCGTGTCGCCG
771-OsGLK1-R	CGCGTACGAGATCTGGTCGACTCCACACGCTGGAGGAACG
771-OsGLK2-F	ACGGGGGACGAGCTCGGTACCATGCTTGAGGTGTCCACGCT
771-OsGLK2-R	CGCGTACGAGATCTGGTCGACGCCGGCGGCACCGCTCGC
OsCHLD-qPCR-F	TCGAAAAGCAGGCGCACT	RT-qPCR
OsCHLD-qPCR-R	GCAAAATCTCCACGAAATGG
OsCHLH-qPCR-F	ATCTGCTAGCCCTCACCAT
OsCHLH-qPCR-R	CCAATGAGACTGTCAGGATAGC
OsCHLI-qPCR-F	GATAGAGTCTGTGGCACCATTG
OsCHLI-qPCR-R	GCAGAATCCAGAAGCACATCT
OsCRD1-qPCR-F	CCGTCAAGCTAGACTGCAG
OsCRD1-qPCR-R	CAAGAAACGCTTCACAGAGGT
OsDVR-qPCR-F	AGAGCATGCTGGTGCTC
OsDVR-qPCR-R	GAAGATGGTCTGCTCGCC
OsGNC-qPCR-F	AGACCATCACTTGACACAGC
OsGNC-qPCR-R	TGCAGCTTCTCGGTATCGTAT
OsGUN4-qPCR-F	CAGCAGCATTTCATTCAAGCT
OsGUN4-qPCR-R	GTAATCCCTCTCGGCGAG
OsPORA-qPCR-F	AAGTTCAGGCCGCACTC
OsPORA-qPCR-R	GACGGCTTCTTGGCCTT
OsPORB-qPCR-F	ACTGGAGCTGGAACAACA
OsPORB-qPCR-R	TCACTGATCGTGATCGGC
OsPIL14-qPCR-F	AGAAGGGATAGGATCAATGAG
OsPIL14-qPCR-R	GGTACCGGGGAACATCAT
OsOsGLK1-qPCR-F	ATGCCAGCTGCGAGATT
OsOsGLK1-qPCR-R	CATCACCGATAGCTGCGT
OsLHCA1-qPCR-F	TGCTGGCTTTTGTGGGTTTCTG
OsLHCA1-qPCR-R	GGATGATGATGTCGCCGATGTTG
OsLHCA2-qPCR-F	AGCAGCAATACTTCACCGACACCA
OsLHCA2-qPCR-R	CCGAGCGGGTCAAACCACAGA
OsLHCA3-qPCR-R	AAGAGCGAGGCGGAGATGAAGG
OsLHCA3-qPCR-F	GGCTGGTGAGGATGTTGTTGTGG
OsLHCA4-qPCR-F	ATGCTGGCGTTCTTGGGGTTC
OsLHCA4-qPCR-R	GCGTCTGGATGATGGTGTTGTGC
OsLHCA5-qPCR-F	TCACAAGCAGAGGAAGGAACA
OsLHCA5-qPCR-R	AAGCATAGCAACCATAGCCAA
OsLHCA6-qPCR-F	TGCGCACCAAGGAGATCAAGAAC
OsLHCA6-qPCR-R	AATGGGACGTGAATGCCGAGAA
OsLHCB1.1-qPCR-F	AGAACCGGGAGCTGGAGGTGATC
OsLHCB1.1-qPCR-R	AGCCCCCCCTCGCTGAAGAT
OsLHCB2-qPCR-F	GGGGAGGCGGTGTGGTTCAA
OsLHCB2-qPCR-R	TCGGCGAAGGTGTCAGGGTC
OsLHCB3-qPCR-F	CGGATAGGGTGAAGTACCTGGGG
OsLHCB3-qPCR-R	CACACGGGCTCCTTGAAGTCG
OsLHCB4-qPCR-F	AAGTCCACCCCGTTCCAGCC
OsLHCB4-qPCR-R	GGTACGACGACCCATCCACCAG
OsLHCB5-qPCR-F	TTCGGCAACAGCATCCCCAT
OsLHCB5-qPCR-R	CCCGTTCTTGATCTCCTTCACCTT
OsLHCB6-qPCR-F	GCCGAGTTCATCAACCCGCC
OsLHCB6-qPCR-R	CCCGACGAAGATCCCCAGCA
OsPORA-ChIP-qPCR-F1	TACTTTTGTACTGTATTTGTC	ChIP-qPCR
OsPORA-ChIP-qPCR-R1	CGTGCGGTAAACGACTG
OsPORA-ChIP-qPCR-F2	CCACGCCCAAACACCGC
OsPORA-ChIP-qPCR-R2	ACGATTTTTTTCCTTCGAGAT
OsPORA-ChIP-qPCR-F3	GAAGCAAAAGGACACCAGAAACA
OsPORA-ChIP-qPCR-R3	TTGGGGACAGAGAGAGCAGAG
OsLHCB4-ChIP-qPCR-F1	GGTGGAAACGAGCAGGAAGA
OsLHCB4-ChIP-qPCR-R1	GGCTCCTGCTCCACATAACA
OsLHCB4-ChIP-qPCR-F2	GGGAGTGAGTGCTACCGTG
OsLHCB4-ChIP-qPCR-R2	ACGAGAGCAGCCAAAGTGTC
OsLHCB4-ChIP-qPCR-F3	CCATCCACCCTGAAGACCAC
OsLHCB4-ChIP-qPCR-R3	ACGGTTGGCTCTGCCTTATC
OsGLK1-ChIP-qPCR-F1	ATGTGAAATGAAGAGCCCAGT
OsGLK1-ChIP-qPCR-R1	TATTCCTCTTTTTCATTCCAT
OsGLK1-ChIP-qPCR-F2	AAAAAGACAGTGGAAAGTGAT
OsGLK1-ChIP-qPCR-R2	CTTCTATTATAAGTGGCTGGT
OsGLK1-ChIP-qPCR-F3	TGCAGGACAGTCTCCAGC
OsGLK1-ChIP-qPCR-R3	GCGAAGAACAGAAACACATAT
OsGLK1-ChIP-qPCR-F4	CTCATCCACACACTGCCCTGC
OsGLK1-ChIP-qPCR-R4	CGGTTGGTGCGGTGGTGA
OsGLK1-ChIP-qPCR-F5	GCTGAGCCTGAGCGAGCAACT
OsGLK1-ChIP-qPCR-R5	GCGACACGGCAAGCATCTC
ACTIN-ChIP-qPCR-F	GCTGTTTGGATCTCAGGGTGGTTTC
ACTIN-ChIP-qPCR-R	GCCGACAATGCTGGGGAAGAC
