# Supplementary figures and images for: OsNF-YB7 inactivates OsGLK1 to inhibit chlorophyll biosynthesis in rice embryo
Source: eLife journal article supplement (doi:10.7554/elife.96553), 2024-03-23

|                          |   |   |    |    |    |   |   |
|--------------------------|---|---|----|----|----|---|---|
| OsNF-YB7-His             | - | + | +  | +  | +  | + | - |
| GST-His                  | - | - | -  | -  | -  | - | + |
| Hot Probe<br>(-CACGTG-)  | + | + | +  | +  | +  | - | + |
| Cold Probe               | - | - | 1x | 2x | 5x | - | - |
| Hot mProbe<br>(-AAAAAA-) | - | - | -  | -  | -  | + | - |

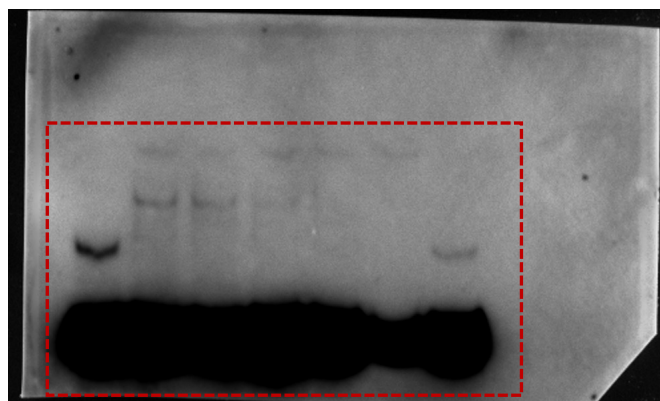

Supplement: fig2-data1 [file elife-96553-fig2-data1-v1.zip]

|                          |   |   |   |    |     |     |   |
|--------------------------|---|---|---|----|-----|-----|---|
| OsNF-YB7-His             | - | - | + | +  | +   | +   | + |
| GST-His                  | - | + | - | -  | -   | -   | - |
| Hot Probe<br>(-CACGTG-)  | + | + | + | +  | +   | +   | - |
| Cold Probe               | - | - | - | 1x | 10x | 20x | - |
| Hot mProbe<br>(-AAAAAA-) | - | - | - | -  | -   | -   | + |

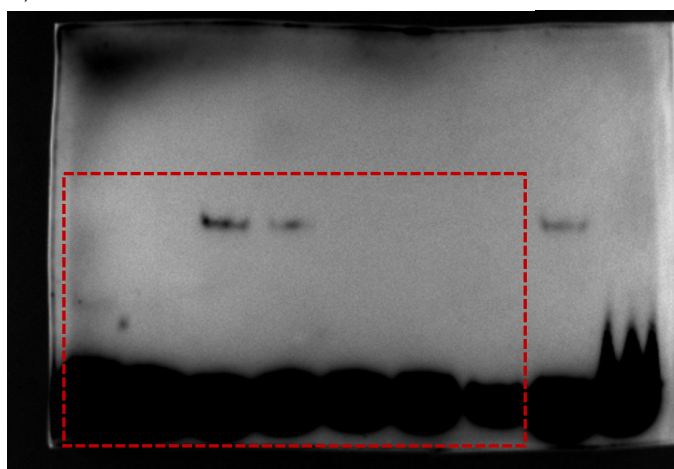

Supplement: fig2-data1 [file elife-96553-fig2-data1-v1.zip]

|                     |   |   |     |   |
|---------------------|---|---|-----|---|
| OsNF-YB7-His        | - | + | +   | + |
| Hot Probe (OsGLK1)  | + | + | +   | - |
| Cold Probe (OsGLK1) | - | - | 50x | - |
| Hot Probe (OsLHCB4) | - | - | -   | + |

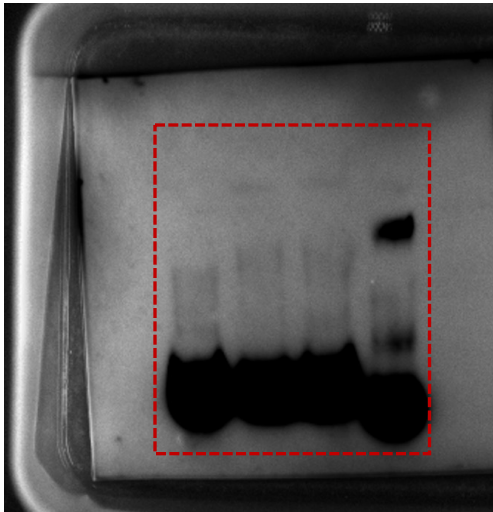

Supplement: fig3-figsupp1-data1 [file elife-96553-fig3-figsupp1-data1-v1.zip]

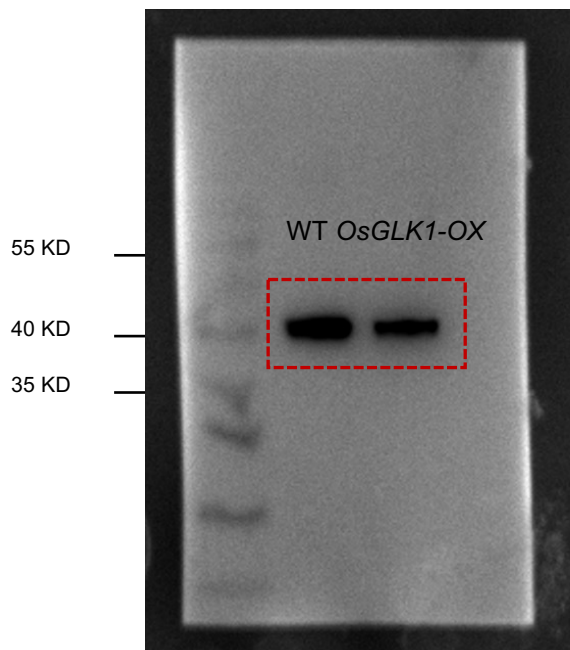

$\alpha$ -GAPDH

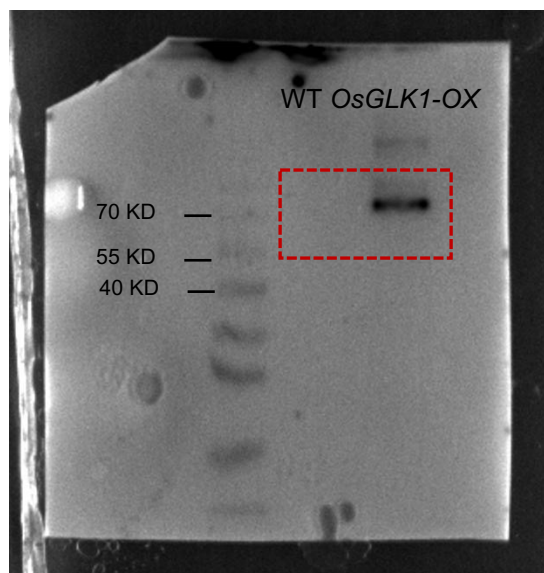

$\alpha$ -Flag

Supplement: fig4-figsupp1-data1 [file elife-96553-fig4-figsupp1-data1-v1.zip]

|            | P2 |   |     |      |      |   |
|------------|----|---|-----|------|------|---|
| OsGLK1-MBP | -  | + | +   | +    | +    | - |
| MBP        | -  | - | -   | -    | -    | + |
| Hot Probe  | +  | + | +   | +    | +    | + |
| Cold Probe | -  | - | 50x | 100x | 200x | - |

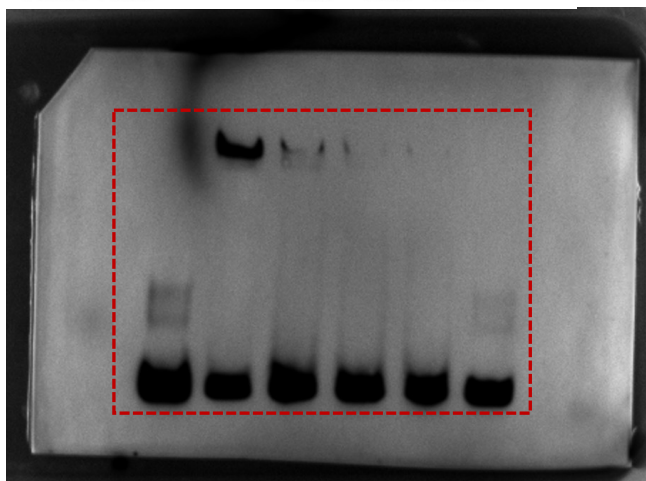

Supplement: fig5-data2 [file elife-96553-fig5-data2-v1.zip]

|            | P3 |   |     |     |     |   |
|------------|----|---|-----|-----|-----|---|
| OsGLK1-MBP | -  | + | +   | +   | +   | - |
| MBP        | -  | - | -   | -   | -   | + |
| Hot Probe  | +  | + | +   | +   | +   | + |
| Cold Probe | -  | - | 10x | 20x | 50x | - |

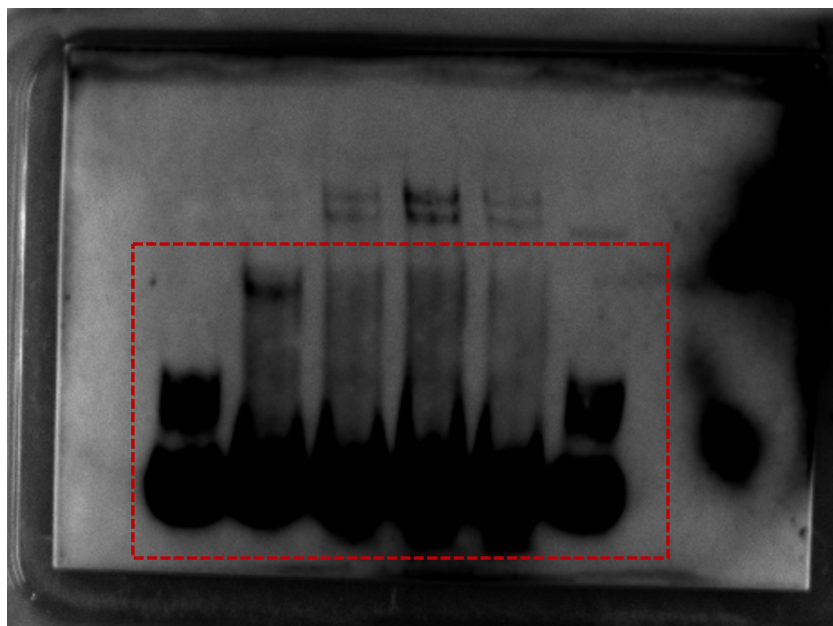

Supplement: fig5-data2 [file elife-96553-fig5-data2-v1.zip]

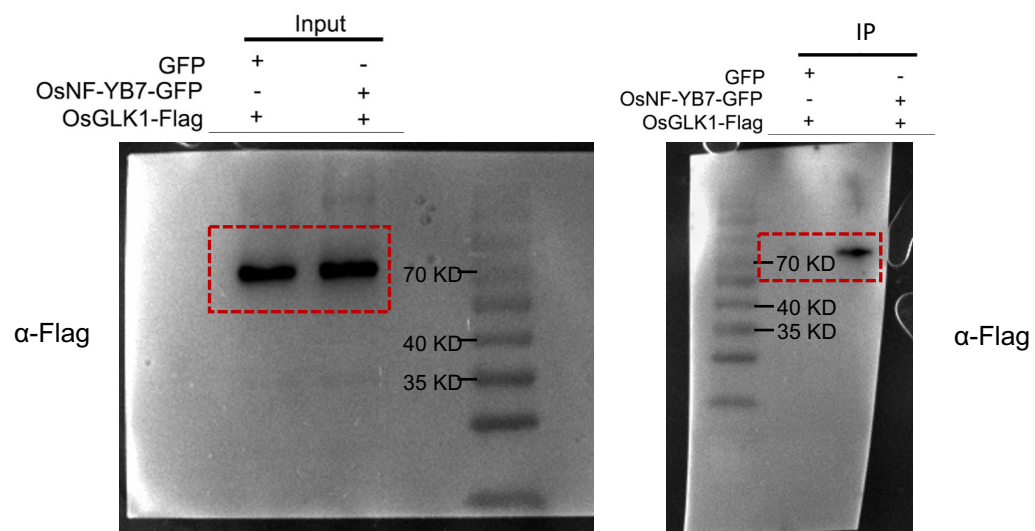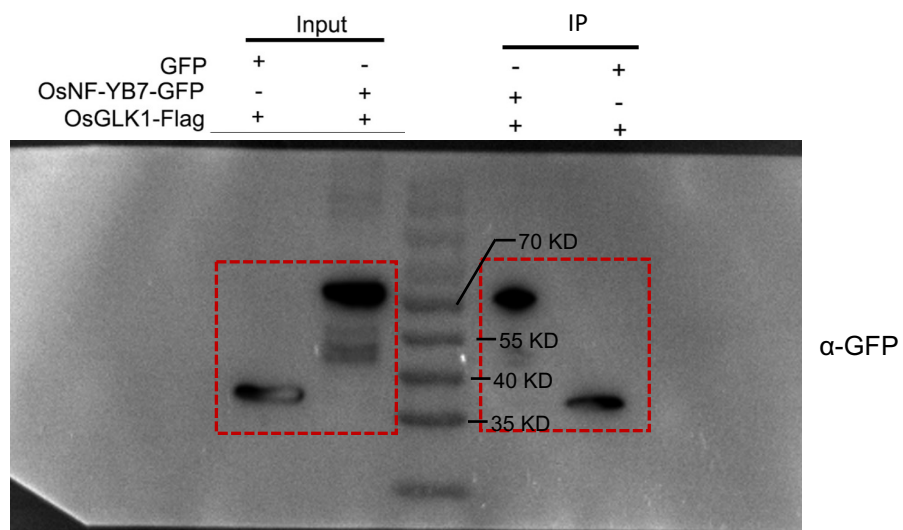

Supplement: fig6-data1 [file elife-96553-fig6-data1-v1.zip]

|              |   |   |   |   |   |   |    |    |
|--------------|---|---|---|---|---|---|----|----|
| Probe        | + | + | + | + | + | + | +  | +  |
| OsNF-YB7-His | - | - | - | + | - | + | ++ | -  |
| OsGLK1-MBP   | - | - | - | - | + | + | +  | +  |
| MBP          | - | - | + | - | - | - | -  | -  |
| GST-His      | - | + | - | - | - | - | -  | ++ |

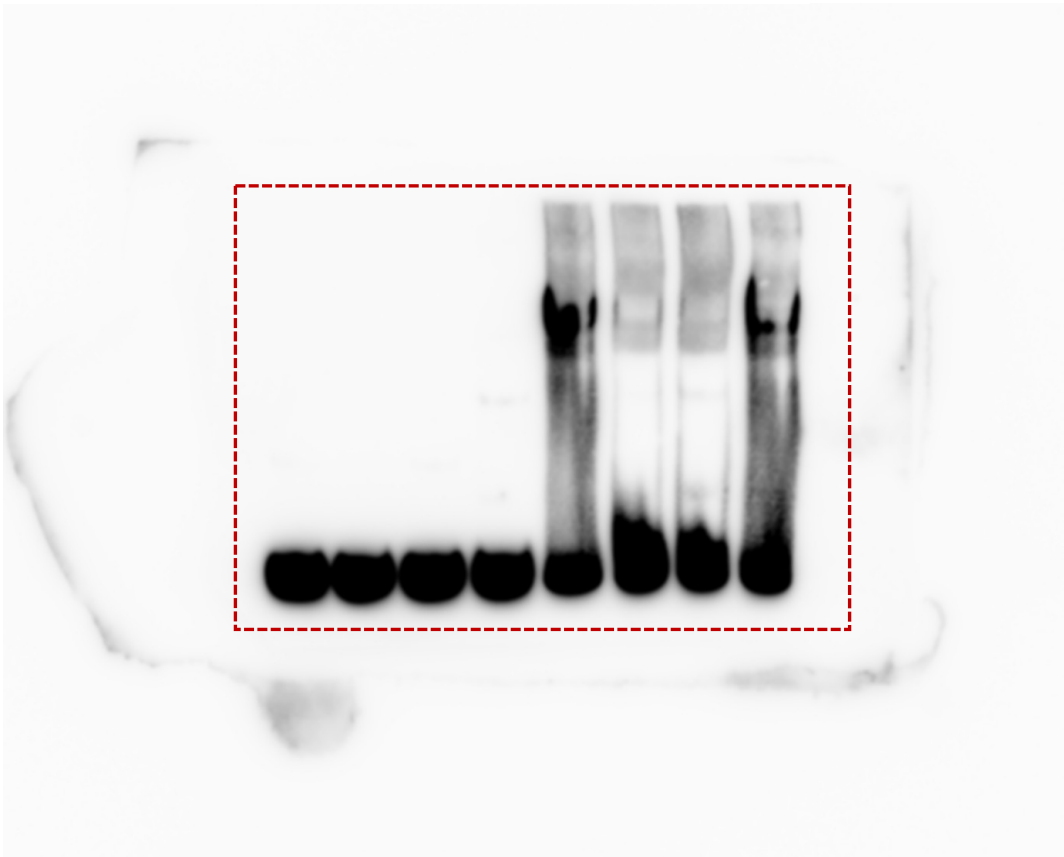

Supplement: fig6-data1 [file elife-96553-fig6-data1-v1.zip]
